# Supplementary material for: Decarboxylative Umpolung of conjugated enals to β-carbanions for intramolecular nucleophilic addition to an aldehyde
Source: Royal Society of Chemistry journal article supplement (doi:10.1039/c6qo00846a), 2017-01-01

# **Decarboxylative Umpolung of Conjugated Enal to $\beta$ -Carbanion for Intramolecular Nucleophilic Addition to Aldehyde**

Feng Liu, Jiaxin Tian, Yong Liu, Chuangan Tao, Hao Zhu, Aina Zhang, Dongfang Xu  
and Baoguo Zhao\*

The Education Ministry Key Lab of Resource Chemistry and Shanghai Key Laboratory of Rare  
Earth Functional Materials, Shanghai Normal University, Shanghai 200234, P. R. China  
zhaobg2006@hotmail.com

## **Supporting Information**

### **Table of Contents**

|                                                      |      |
|------------------------------------------------------|------|
| General methods                                      | S-2  |
| Synthesis of compounds <b>7a-b</b> and <b>7g-j</b>   | S-2  |
| Synthesis of compounds <b>7c-f</b>                   | S-5  |
| Synthesis of compound <b>7k</b>                      | S-7  |
| Synthesis of compound <b>7l</b>                      | S-8  |
| Representative procedure for cyclization of <b>7</b> | S-9  |
| Procedure for deprotection of compound <b>8a</b>     | S-9  |
| Procedure for reduction of compound <b>8a</b>        | S-10 |
| Characterization data                                | S-11 |

**General Methods.** All commercially available reagents were used without further purification unless otherwise stated. Column chromatography was performed on silica gel (200-300 mesh).  $^1\text{H}$  NMR spectra were recorded on a 400 or 600 MHz NMR spectrometer and  $^{13}\text{C}$  NMR spectra were recorded on a 100 MHz NMR spectrometer. IR spectra were recorded on a FT-IR spectrometer. Melting points were uncorrected.

**Procedures for the Synthesis of Compounds 7a-b and 7g-j Using 7a as the Representative Example (Table 2)**

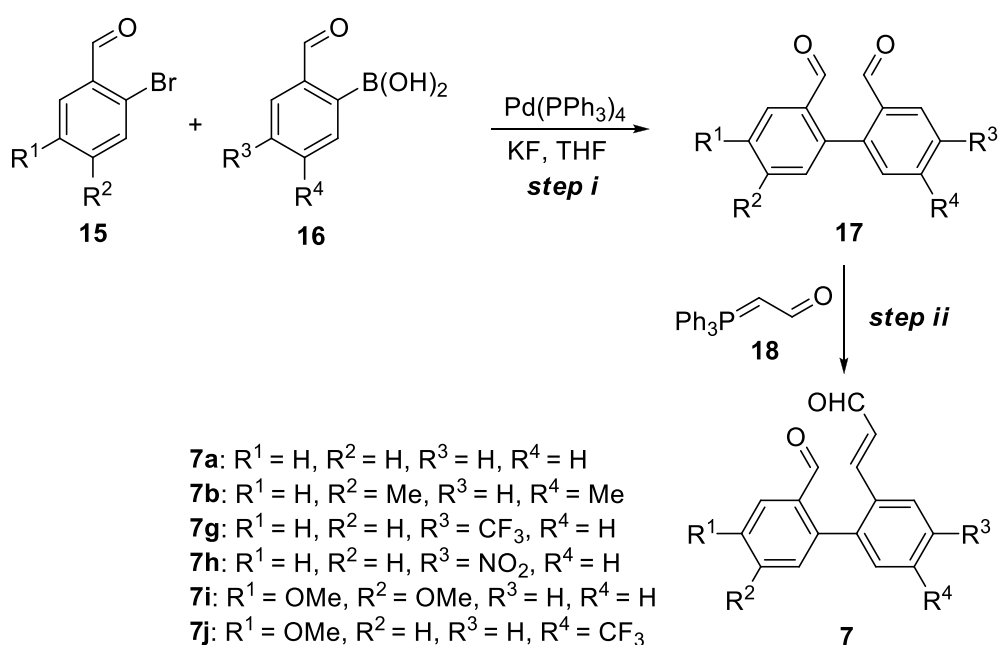

**Step i. Synthesis of compound 17a<sup>1</sup>**

A mixture of 2-bromobenzaldehyde **15a** (10.0 g, 54.1 mmol), (2-formylphenyl)boronic acid **16a** (9.84 g, 65.6 mmol),  $\text{KF} \cdot 2\text{H}_2\text{O}$  (17.0 g, 180.3 mmol), and  $\text{Pd}(\text{PPh}_3)_4$  (1.89 g, 1.64 mmol) in THF (250 mL) was vigorously stirred under  $\text{N}_2$  atmosphere at room temperature for 20 min and then at  $60^\circ\text{C}$  for 24 hours. The reaction mixture was cooled to room temperature and concentrated under reduced pressure to remove most of the solvent. Water (30 mL) was added. The resulting suspend was extracted with EtOAc (50 mL  $\times$  3). The combined organic layers were dried over  $\text{Na}_2\text{SO}_4$ , filtered, concentrated under reduced pressure, and purified by

column chromatography (petroleum ether / ethyl acetate = 30:1) to give the product **17a** (9.3 g, 82%) as a white solid.

**17a**: White solid;  $^1\text{H}$  NMR (400 MHz,  $\text{CDCl}_3$ )  $\delta$  9.84 (s, 2H), 8.07 (dd,  $J = 7.6$ , 1.2 Hz, 2H), 7.68 (td,  $J = 7.6$ , 1.6 Hz, 2H), 7.60 (dd,  $J = 7.6$ , 7.2 Hz, 2H), 7.36 (d,  $J = 7.6$  Hz, 2H).

Reference 1: K. Yasamut, J. Jongcharoenkamol, S. Ruchirawat and P. Ploypradith, *Tetrahedron*, 2016, **72**, 5994-6000.

### Step ii. Synthesis of compound **7a**

A mixture of compound **17a** (2.0 g, 9.51 mmol) and Wittig reagent **18** (4.4 g, 14.4 mmol) in toluene (30 mL) was stirred at 60 °C for 24 h. The reaction mixture was cooled to room temperature, filtered, concentrated under reduced pressure, and purified by column chromatography (petroleum ether / ethyl acetate = 10:1) to give the product **7a** (0.80 g, 36%) as a yellow oil.

**7a**: Yellow oil; IR (KBr) 2747, 1678, 1621, 1594, 1468, 1393, 1161, 1128  $\text{cm}^{-1}$ ;  $^1\text{H}$  NMR (600 MHz,  $\text{CDCl}_3$ )  $\delta$  9.76 (s, 1H), 9.43 (d,  $J = 7.2$  Hz, 1H), 8.08 (dd,  $J = 7.8$ , 1.2 Hz, 1H), 7.83-7.76 (m, 1H), 7.69 (ddd,  $J = 7.8$ , 7.2, 1.2 Hz, 1H), 7.60 (dd,  $J = 7.8$ , 7.2 Hz, 1H), 7.55-7.50 (m, 2H), 7.37-7.32 (m, 2H), 7.21 (d,  $J = 15.6$  Hz, 1H), 6.63 (dd,  $J = 15.6$ , 7.2 Hz, 1H); HRMS  $m/z$  Calcd. For  $\text{C}_{16}\text{H}_{12}\text{O}_2$  ( $\text{M} + \text{Na}^+$ ): 259.0735; Found: 259.0735.

Compounds **7b** and **7g-j** were prepared respectively in 27%, 22%, 38%, 22%, and 17% yields for two steps by following a similar procedure.

**7b**: Yellow solid; IR (KBr) 2847, 1686, 1665, 1600, 1389, 1206, 1123  $\text{cm}^{-1}$ ;  $^1\text{H}$  NMR (600 MHz,  $\text{CDCl}_3$ )  $\delta$  9.68 (s, 1H), 9.42 (d,  $J = 7.8$  Hz, 1H), 7.96 (d,  $J = 7.8$  Hz, 1H), 7.68 (d,  $J = 8.2$  Hz, 1H), 7.38 (d,  $J = 7.8$  Hz, 1H), 7.31 (d,  $J = 7.8$  Hz, 1H), 7.17 (d,  $J = 15.6$  Hz, 1H), 7.14 (s, 1H), 7.12 (s, 1H), 6.59 (dd,  $J = 16.2$ , 7.8 Hz, 1H), 2.48 (s, 3H), 2.43 (s, 3H); HRMS  $m/z$  Calcd. For  $\text{C}_{18}\text{H}_{16}\text{O}_2$  ( $\text{M} + \text{Na}^+$ ): 287.1048; Found: 287.1050.

**7g:** Yellow solid; IR (KBr) 2741, 1682, 1615, 1597, 1332, 1772, 1128  $\text{cm}^{-1}$ ;  $^1\text{H}$  NMR (400 MHz,  $\text{CDCl}_3$ )  $\delta$  9.77 (s, 1H), 9.46 (d,  $J = 7.6$  Hz, 1H), 8.09 (d,  $J = 7.6$  Hz, 1H), 8.01 (s, 1H), 7.80-7.70 (m, 2H), 7.66 (dd,  $J = 7.6, 7.2$  Hz, 1H), 7.48 (d,  $J = 8.0$  Hz, 1H), 7.31 (d,  $J = 8.4$  Hz, 1H), 7.18 (d,  $J = 16.0$  Hz, 1H), 6.67 (dd,  $J = 16.0, 7.2$  Hz, 1H); HRMS  $m/z$  Calcd. For  $\text{C}_{17}\text{H}_{11}\text{F}_3\text{O}_2$  ( $\text{M} + \text{Na}^+$ ): 327.0609; Found: 327.0608.

**7h:** Yellow solid; IR (KBr) 2851, 1691, 1676, 1592, 1515, 1346, 1114  $\text{cm}^{-1}$ ;  $^1\text{H}$  NMR (600 MHz,  $\text{CDCl}_3$ )  $\delta$  9.81 (s, 1H), 9.48 (d,  $J = 7.2$  Hz, 1H), 8.62 (d,  $J = 2.4$  Hz, 1H), 8.34 (dd,  $J = 8.4, 2.4$  Hz, 1H), 8.08 (d,  $J = 7.8$  Hz, 1H), 7.76 (dd,  $J = 7.8, 6.6$  Hz, 1H), 7.71 (dd,  $J = 7.8, 7.2$  Hz, 1H), 7.51 (d,  $J = 8.4$  Hz, 1H), 7.31 (d,  $J = 7.2$  Hz, 1H), 7.15 (d,  $J = 16.2$  Hz, 1H), 6.73 (dd,  $J = 16.2, 7.8$  Hz, 1H); HRMS  $m/z$  Calcd. For  $\text{C}_{16}\text{H}_{11}\text{NO}_4$  ( $\text{M} + \text{Na}^+$ ): 304.0586; Found: 304.0582.

**7i:** White solid; IR (KBr) 2843, 1676, 1593, 1511, 1352, 1280, 1139  $\text{cm}^{-1}$ ;  $^1\text{H}$  NMR (400 MHz,  $\text{CDCl}_3$ )  $\delta$  9.56 (s, 1H), 9.47 (d,  $J = 7.6$  Hz, 1H), 7.83-7.75 (m, 1H), 7.56 (s, 1H), 7.55-7.49 (m, 2H), 7.40-7.36 (m, 1H), 7.22 (s, 1H), 6.73 (s, 1H), 6.65 (dd,  $J = 16.0, 7.6$  Hz, 1H), 4.02 (s, 3H), 3.95 (s, 3H); HRMS  $m/z$  Calcd. For  $\text{C}_{18}\text{H}_{16}\text{O}_4$  ( $\text{M} + \text{Na}^+$ ): 319.0946; Found: 319.0938.

**7j:** Yellow solid; IR (KBr) 2740, 1683, 1604, 1416, 1336, 1132  $\text{cm}^{-1}$ ;  $^1\text{H}$  NMR (400 MHz,  $\text{CDCl}_3$ )  $\delta$  9.68 (s, 1H), 9.48 (d,  $J = 7.6$  Hz, 1H), 7.88 (d,  $J = 8.0$  Hz, 1H), 7.76 (d,  $J = 8.0$  Hz, 1H), 7.60 (s, 1H), 7.57 (d,  $J = 1.6$  Hz, 1H), 7.29-7.24 (m, 2H), 7.21 (d,  $J = 16.0$  Hz, 1H), 6.68 (dd,  $J = 16.0, 7.6$  Hz, 1H), 3.95 (s, 3H); HRMS  $m/z$  Calcd. For  $\text{C}_{18}\text{H}_{13}\text{F}_3\text{O}_3$  ( $\text{M} + \text{Na}^+$ ): 357.0714; Found: 357.0713.

**Procedures for Synthesis of Compounds 7c-f Using 7d as the Representative Example (Table 2)**

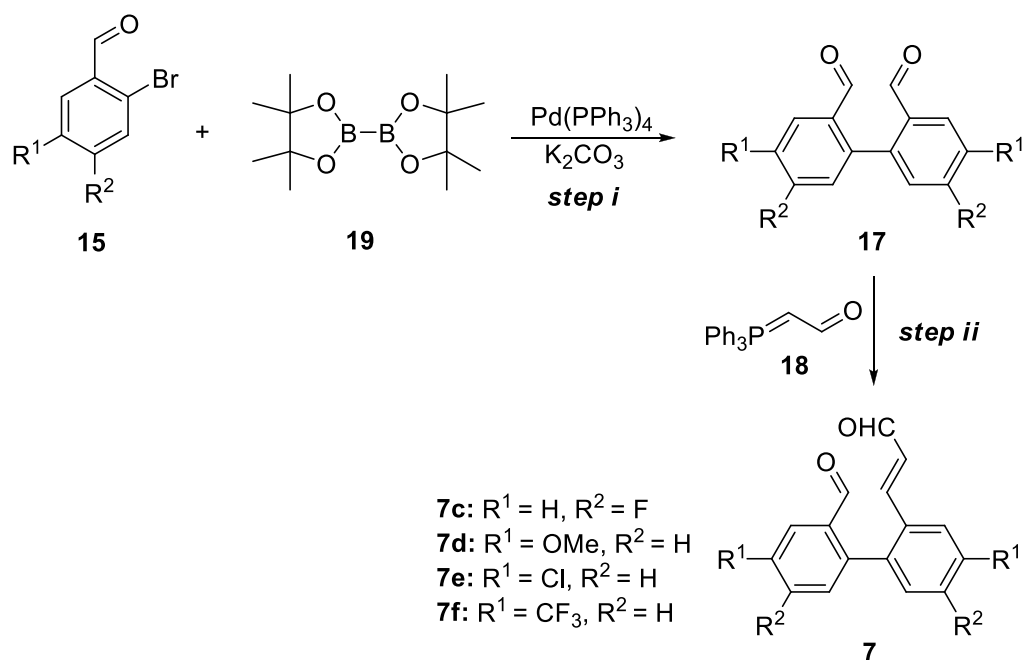

**Step i. Synthesis of compound 17d<sup>1</sup>**

A mixture of 2-bromo-5-methoxybenzaldehyde (**15d**) (0.86 g, 4.0 mmol), 4,4,4',4',5,5,5',5'-octamethyl-2,2'-bi(1,3,2-dioxaborolane) (**19**) (0.51 g, 2.0 mmol), K<sub>2</sub>CO<sub>3</sub> (0.83 g, 6.0 mmol) and Pd(PPh<sub>3</sub>)<sub>4</sub> (0.070 g, 0.060 mmol) in dioxane (20 mL) was vigorously stirred under N<sub>2</sub> atmosphere at room temperature for 20 min and then at 80 °C for 12 hours. The reaction mixture was cooled to room temperature, concentrated under reduced pressure, and purified by column chromatography (petroleum ether / ethyl acetate=10:1) to give the product **17d** (0.184 g, 34%) as a white solid.

**17d:** White solid; <sup>1</sup>H NMR (600 MHz, CDCl<sub>3</sub>) δ 9.80 (s, 2H), 7.54 (d, *J* = 2.4 Hz, 2H), 7.26 (d, *J* = 8.4 Hz, 2H), 7.20 (dd, *J* = 8.4, 2.4 Hz, 2H), 3.93 (s, 6H).

Reference 1: K. Yasamut, J. Jongcharoenkamol, S. Ruchirawat and P. Ploypradith, *Tetrahedron*, 2016, **72**, 5994-6000.

**Step ii. Synthesis of compound 7d**

A mixture of dialdehyde **17d** (0.184 g, 0.68 mmol) and Wittig reagent **18** (0.42 g,

1.37 mmol) in toluene (10 mL) was stirred at 80 °C for 3 d. The reaction mixture was cooled to room temperature, filtered, concentrated under reduced pressure, and purified by column chromatography (petroleum ether / ethyl acetate = 5:1) to give the product **7d** (0.081 g, 40%) as a red solid.

**7d**: Red solid; IR (KBr) 2840, 1670, 1602, 1476, 1423, 1392, 1126  $\text{cm}^{-1}$ ;  $^1\text{H}$  NMR (600 MHz,  $\text{CDCl}_3$ )  $\delta$  9.71 (s, 1H), 9.46 (d,  $J$  = 7.8 Hz, 1H), 7.54 (s, 1H), 7.26-7.17 (m, 5H), 7.06 (dd,  $J$  = 7.8, 1.8 Hz, 1H), 6.62 (dd,  $J$  = 16.2, 7.8 Hz, 1H), 3.93 (s, 3H), 3.91 (s, 3H); HRMS  $m/z$  Calcd. For  $\text{C}_{18}\text{H}_{16}\text{O}_4(\text{M} + \text{Na}^+)$ : 319.0946; Found: 319.0944.

Compounds **7c** and **7e-f** were prepared respectively in 22%, 11%, and 25% yields for two steps by following a similar procedure.

**7c**: Red solid; IR (KBr) 2754, 1702, 1670, 1574, 1484, 1123  $\text{cm}^{-1}$ ;  $^1\text{H}$  NMR (400 MHz,  $\text{CDCl}_3$ )  $\delta$  9.67 (s, 1H), 9.44 (d,  $J$  = 7.6 Hz, 1H), 8.12 (dd,  $J$  = 8.8, 5.6 Hz, 1H), 7.80 (dd,  $J$  = 8.8, 5.2 Hz, 1H), 7.33 (ddd,  $J$  = 8.8, 8.0, 2.4 Hz, 1H), 7.29-7.23 (m, 1H), 7.13-7.01 (m, 3H), 6.58 (dd,  $J$  = 16.0, 7.6 Hz, 1H); HRMS  $m/z$  Calcd. For  $\text{C}_{16}\text{H}_{10}\text{F}_2\text{O}_2(\text{M} + \text{Na}^+)$ : 295.0547; Found: 295.0545.

**7e**: Yellow solid; IR (KBr) 2853, 1676, 1584, 1459, 1385, 1206, 1112  $\text{cm}^{-1}$ ;  $^1\text{H}$  NMR (600 MHz,  $\text{CDCl}_3$ )  $\delta$  9.70 (s, 1H), 9.47 (d,  $J$  = 7.2 Hz, 1H), 8.03 (s, 1H), 7.76 (s, 1H), 7.67 (dd,  $J$  = 8.4, 2.4 Hz, 1H), 7.55-7.44 (m, 3H), 7.14 (d,  $J$  = 8.4 Hz, 1H), 7.09 (d,  $J$  = 15.6 Hz, 1H), 6.63 (dd,  $J$  = 15.6, 7.8 Hz, 1H); HRMS  $m/z$  Calcd. For  $\text{C}_{16}\text{H}_{10}\text{Cl}_2\text{O}_2(\text{M} + \text{Na}^+)$ : 326.9956; Found: 326.9951.

**7f**: Yellow solid; IR (KBr) 2854, 1676, 1614, 1571, 1330, 1119  $\text{cm}^{-1}$ ;  $^1\text{H}$  NMR (400 MHz,  $\text{CDCl}_3$ )  $\delta$  9.79 (s, 1H), 9.50 (d,  $J$  = 7.2 Hz, 1H), 8.36 (s, 1H), 8.04 (s, 1H), 7.98 (d,  $J$  = 8.0 Hz, 1H), 7.80 (d,  $J$  = 7.8 Hz, 1H), 7.54-7.42 (m, 2H), 7.13 (d,  $J$  = 16.0 Hz, 1H), 6.72 (dd,  $J$  = 16.0, 7.6 Hz, 1H); HRMS  $m/z$  Calcd. For  $\text{C}_{18}\text{H}_{10}\text{F}_6\text{O}_2(\text{M} + \text{Na}^+)$ : 395.0483; Found: 395.0476.

## Procedure for Synthesis of Compound 7k

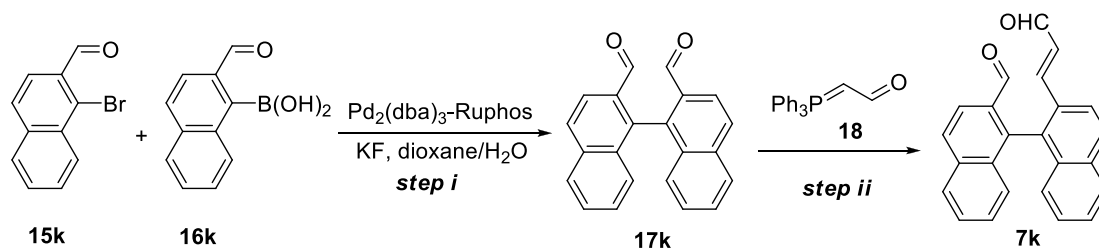

### Step i. Synthesis of compound **17k**<sup>2</sup>

A mixture of 1-bromo-2-naphthaldehyde (**15k**) (1.0 g, 4.26 mmol), (2-formylnaphthalen-1-yl)boronic acid (**16k**) (1.28 g, 6.38 mmol),  $\text{Pd}_2(\text{dba})_3$  (0.10 g, 0.109 mmol) and dicyclohexyl(2',6'-diisopropoxy-[1,1'-biphenyl]-2-yl)phosphine (RuPhos) (0.10 g, 0.215 mmol) in dioxane (5.0 mL) and  $\text{H}_2\text{O}$  (40 mL) was vigorously stirred under  $\text{N}_2$  atmosphere at room temperature for 20 min and then at  $100\text{ }^\circ\text{C}$  for 21 hours. The reaction mixture was cooled to room temperature and extracted with EtOAc (10 mL  $\times$  3). The combined organic layers were dried over  $\text{Na}_2\text{SO}_4$ , filtered, concentrated under reduced pressure and, and purified by column chromatography (petroleum ether / ethyl acetate=30:1) to give the product **17k** (0.687 g, 52%) as a yellow solid.

**17k**: Yellow solid;  $^1\text{H}$  NMR (600 MHz,  $\text{CDCl}_3$ )  $\delta$  9.62 (s, 2H), 8.21 (d,  $J = 8.4$  Hz, 2H), 8.13 (d,  $J = 8.4$  Hz, 2H), 8.02 (d,  $J = 8.4$  Hz, 2H), 7.64 (dd,  $J = 8.4, 6.6$  Hz, 2H), 7.38 (t,  $J = 7.8$  Hz, 2H), 7.23 (d,  $J = 8.4$  Hz, 2H).

Reference 2: C. Zhu, Y. Shi, M.-H. Xu and G.-Q. Lin, *Org. Lett.*, 2008, **10**, 1243-1246.

### Step ii. Synthesis of compound **7k**

A mixture of dicarbaldehyde **17k** (0.68 g, 2.19 mmol) and 2-(triphenylphosphoranylidene)acetaldehyde (**18**) (1.33 g, 4.39 mmol) in toluene (15.0 mL) was stirred at  $60\text{ }^\circ\text{C}$  for 24 h. The reaction mixture was cooled to room temperature, filtered, concentrated under reduced pressure, and purified by column chromatography (petroleum ether / ethyl acetate = 10:1) to give the product **7k** (0.183 g, 25%) as a yellow solid.

**7k**: Yellow solid; IR (KBr) 2923, 2852, 1630, 1612, 1577, 1402, 1384, 1119  $\text{cm}^{-1}$ ;  $^1\text{H}$  NMR (400 MHz,  $\text{CDCl}_3$ )  $\delta$  9.57 (s, 1H), 9.25 (d,  $J = 7.6$  Hz, 1H), 8.21 (d,  $J = 8.8$  Hz, 1H), 8.14 (d,  $J = 8.8$  Hz, 1H), 8.09 (d,  $J = 8.8$  Hz, 1H), 8.04 (d,  $J = 8.4$  Hz, 1H), 7.98 (d,  $J = 8.4$  Hz, 1H), 7.95 (d,  $J = 8.8$  Hz, 1H), 7.66 (dd,  $J = 8.0, 7.2$  Hz, 1H), 7.56 (dd,  $J = 8.0, 6.8$  Hz, 1H), 7.37 (t,  $J = 7.6$  Hz, 1H), 7.32 (dd,  $J = 8.0, 7.2$  Hz, 1H), 7.22 (d,  $J = 8.4$  Hz, 1H), 7.07 (d,  $J = 8.4$  Hz, 1H), 7.00 (d,  $J = 16.0$  Hz, 1H), 6.75 (dd,  $J = 16.0, 7.6$  Hz, 1H); HRMS  $m/z$  Calcd. For  $\text{C}_{24}\text{H}_{16}\text{O}_2(\text{M} + \text{Na}^+)$ : 359.1048; Found: 359.1042.

### Procedure for Synthesis of Compound **7l**

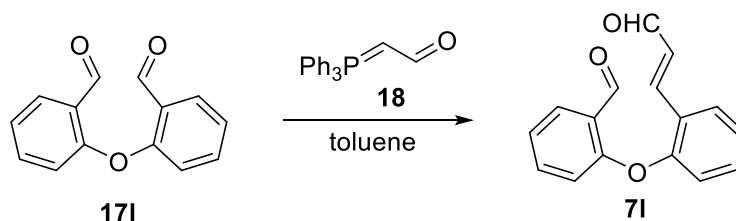

A mixture of dicarbaldheyde **17l**<sup>3</sup> (1.50 g, 6.64 mmol) and 2-(triphenylphosphoranylidene)acetaldehyde (**18**) (4.00 g, 13.27 mmol) in toluene (25.0 mL) was stirred at 60 °C for 24 h. The reaction mixture was cooled to room temperature, filtered, concentrated under reduced pressure, and purified by column chromatography (petroleum ether / ethyl acetate = 10:1) to give the product **7l** (0.367 g, 22%) as a yellow solid.

**7l**: Yellow oil; IR (KBr) 2831, 1672, 1626, 1601, 1472, 1450, 1405, 1237, 1130  $\text{cm}^{-1}$ ;  $^1\text{H}$  NMR (400 MHz,  $\text{CDCl}_3$ )  $\delta$  10.50 (s, 1H), 9.69 (d,  $J = 7.6$  Hz, 1H), 7.99 (dd,  $J = 7.6, 1.6$  Hz, 1H), 7.86 (d,  $J = 16.0$  Hz, 1H), 7.74 (d,  $J = 8.0$  Hz, 1H), 7.60-7.54 (m, 1H), 7.42 (dd,  $J = 8.0, 7.6$  Hz, 1H), 7.28 (d,  $J = 7.6$  Hz, 1H), 7.24 (d,  $J = 7.6$  Hz, 1H), 6.92 (d,  $J = 8.0$  Hz, 1H), 6.87 (d,  $J = 7.6$  Hz, 1H), 6.82 (dd,  $J = 16.0, 8.0$  Hz, 1H); HRMS  $m/z$  Calcd. For  $\text{C}_{16}\text{H}_{12}\text{O}_3(\text{M} + \text{Na}^+)$ : 275.0684; Found: 275.0687.

Reference 3: Y. Xia, Z. Liu, Q. Xiao, P. Qu, R. Ge, Y. Zhang and J. Wang, *Angew. Chem.; Int. Ed.*, 2012, **51**, 5714.



### Representative Procedure for Cyclization of Compounds 7 (Table 2, entry1)

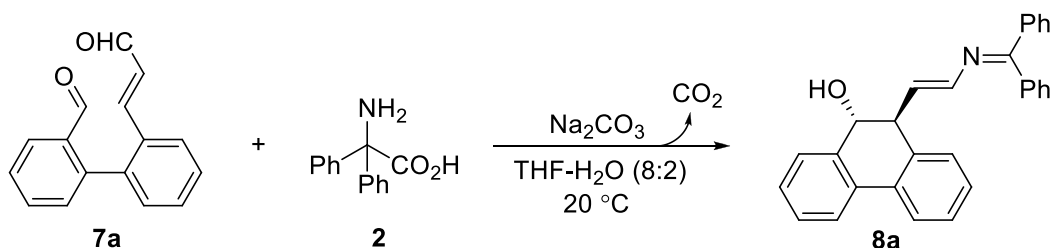

A mixture of compound **7a** (0.60 g, 2.54 mmol), 2,2-diphenylglycine **2** (0.577 g, 2.54 mmol) and  $\text{Na}_2\text{CO}_3$  (0.0543 g, 0.512 mmol) in THF (12.0 mL) and H<sub>2</sub>O (3.0 mL) was stirred at 20 °C for 12 h. The reaction mixture was concentrated under reduced pressure to remove most of the THF. The resulting suspend was extracted with EtOAc (5 mL  $\times$  3). The combined organic layers were dried over  $\text{Na}_2\text{SO}_4$ , filtered, concentrated under reduced pressure, and purified by column chromatography (petroleum ether / ethyl acetate = 10:1) to give the product **8a** (0.862 g, 85%) as a yellow solid.

### Procedure for Synthesis of Compound 14

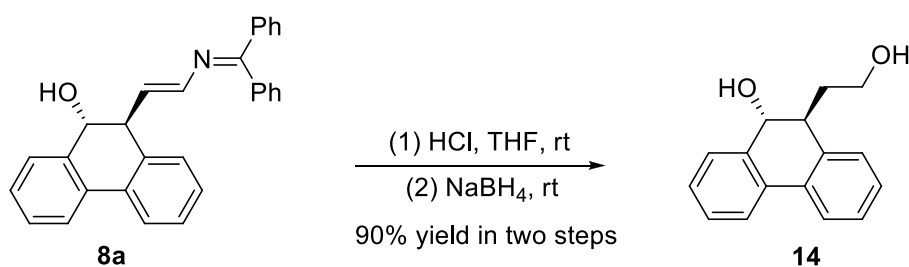

A mixture of compound **8a** (0.40 g, 0.996 mmol), 0.1 M HCl (10.0 mL) and THF (10.0 mL) was stirred at room temperature overnight. The reaction is completed as judged by TLC analysis. The reaction was neutralized with saturated aqueous  $\text{NaHCO}_3$  solution until the pH = 7-8. The THF solvent was removed by concentration under reduced pressure. The resulting stuff was extracted with ethyl acetate (5 mL  $\times$  3). The combined organic layers were dried over  $\text{Na}_2\text{SO}_4$ , filtered, concentrated under reduced pressure, and purified by column chromatography (petroleum ether / ethyl

acetate = 5:1) to give the hydrolysis product as a yellow oil. The oil was dissolved in MeOH (4.0 mL). To the solution was added a solution of NaBH<sub>4</sub> (0.080 g, 2.1 mmol) of MeOH (4.0 mL) at 0 °C over 5 min. After being stirred at 0 °C for 2 h, the reaction was quenched with saturated aqueous NH<sub>4</sub>Cl solution. The resulting mixture was concentrated under reduced pressure to remove most of the solvent and then extracted with ethyl acetate (5 mL × 3). The combined organic layers were dried over Na<sub>2</sub>SO<sub>4</sub>, filtered, concentrated under reduced pressure, and purified by column chromatography (petroleum ether / ethyl acetate = 4:3) to give the product **14** (0.216 g, 90% for two steps) as a white solid.

**14**: White solid; m.p. 178-181 °C; IR (KBr) 3406, 1572, 1439, 1246, 1233, 1051 cm<sup>-1</sup>; <sup>1</sup>H NMR (400 MHz, DMSO) δ 7.86 (d, *J* = 7.6 Hz, 1H), 7.85 (d, *J* = 7.2 Hz, 1H), 7.39 (ddd, *J* = 7.6, 7.2, 2.0 Hz, 1H), 7.36-7.26 (m, 3H), 7.26-7.20 (m, 2H), 5.00 (d, *J* = 3.2 Hz, 1H), 4.60-4.46 (m, 2H), 3.36-3.28 (m, 2H), 3.12 (ddd, *J* = 8.8, 5.6, 2.4 Hz, 1H), 1.50-1.38 (m, 1H), 1.14-1.01 (m, 1H); <sup>13</sup>C NMR (100 MHz, DMSO) δ 138.7, 136.7, 132.7, 132.0, 130.00, 129.96, 128.6, 127.7, 127.4, 126.8, 123.7, 123.5, 71.1, 58.4, 42.6, 35.6; HRMS *m/z* Calcd. For C<sub>16</sub>H<sub>16</sub>O<sub>2</sub>Na (M + Na<sup>+</sup>): 263.1048; Found: 263.1055.

### Procedure for Synthesis of Compound 15

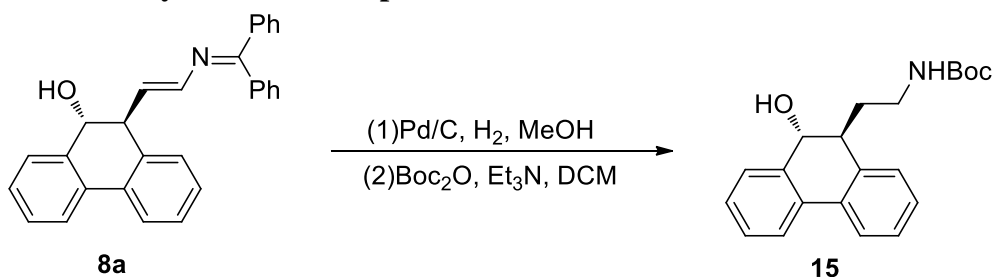

A mixture of compound **8a** (0.40 g, 1.0 mmol), Pd/C (0.40 g) and anhydrous MeOH (8.0 mL) was stirred at 50 °C in an autoclave under 50 atm of H<sub>2</sub> for 24 h. After cooling to room temperature, the reaction mixture was submitted to filtration and then concentrated under reduced pressure to give the reduced free amino alcohol as a yellow oil. The residue was dissolved in dry CH<sub>2</sub>Cl<sub>2</sub> (2.0 mL). To the solution

was added Et<sub>3</sub>N (0.152 g, 1.50 mmol) and Boc<sub>2</sub>O (0.328 g, 1.50 mmol) at 0 °C. After stirring at room temperature for 12 h, the reaction mixture was concentrated and purified via column chromatography (petroleum ether / ethyl acetate=3:1) to give the product **15** as a white solid (0.129 g, 38% in two steps)

**15**: White solid; m.p. 47-48 °C; IR (KBr) 3427, 3068, 2974, 2926, 1681, 1384 cm<sup>-1</sup>; <sup>1</sup>H NMR (400 MHz, CDCl<sub>3</sub>) δ 7.84-7.77 (m, 2H), 7.42 (ddd, *J* = 7.8, 7.2, 1.6 Hz, 1H), 7.38-7.22 (m, 5H), 4.61 (s, 1H), 4.50 (s, 1H), 3.20-2.90 (m, 3H), 2.14 (s, 1H), 1.63-1.49 (m, 1H), 1.41 (s, 9H), 1.32-1.20 (m, 1H); <sup>13</sup>C NMR (100 MHz, CDCl<sub>3</sub>) δ 156.0, 136.6, 135.6, 132.7, 132.0, 130.5, 129.8, 129.5, 128.3, 128.2, 127.7, 124.3, 124.1, 72.78, 72.77, 44.4, 38.6, 33.0, 28.5; HRMS *m/z* Calcd. For C<sub>21</sub>H<sub>25</sub>NO<sub>3</sub>Na (M + Na<sup>+</sup>): 362.1732; Found: 362.1729.

## Characterization Data

### Compound 8a

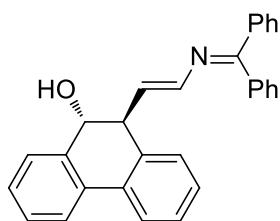

Yellow solid; m.p. 147-150 °C; IR (KBr) 3420, 1656, 1548, 1445, 1277 cm<sup>-1</sup>; <sup>1</sup>H NMR (600 MHz, CDCl<sub>3</sub>) δ 7.78 (t, *J* = 6.6 Hz, 2H), 7.68 (d, *J* = 7.8 Hz, 2H), 7.52 (d, *J* = 7.6 Hz, 1H), 7.49-7.44 (m, 3H), 7.41 (dd, *J* = 7.8, 7.2 Hz, 2H), 7.35-7.315 (m, 4H), 7.30-7.26 (m, 2H), 7.20-7.15 (m, 2H), 6.90 (d, *J* = 13.2 Hz, 1H), 6.12 (dd, *J* = 13.2, 9.6 Hz, 1H), 4.69 (d, *J* = 7.2 Hz, 1H), 3.68 (dd, *J* = 9.6, 7.2 Hz, 1H), 2.41 (s, 1H); <sup>13</sup>C NMR (100 MHz, CDCl<sub>3</sub>) δ 167.1, 141.2, 139.3, 136.6, 136.1, 135.7, 132.9, 132.7, 131.0, 130.5, 129.1, 129.0, 128.9, 128.8, 128.7, 128.6, 128.22, 128.20, 127.8, 127.2, 123.9, 123.8, 71.8, 49.2. HRMS *m/z* Calcd. For C<sub>29</sub>H<sub>24</sub>NO (M + H<sup>+</sup>): 402.1858; Found: 402.1857.

### Compound 8b

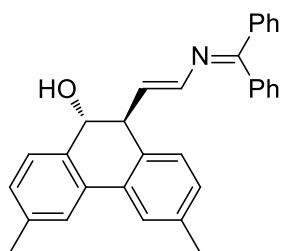

Yellow solid; m.p. 80-82 °C; IR (KBr) 3424, 1617, 1560, 1444, 1384, 1318  $\text{cm}^{-1}$ ;  $^1\text{H}$  NMR (400 MHz,  $\text{CDCl}_3$ )  $\delta$  7.65 (d,  $J = 7.6$  Hz, 2H), 7.60 (s, 1H), 7.59 (s, 1H), 7.49-7.43 (m, 3H), 7.41-7.37 (m, 2H), 7.33 (dd,  $J = 7.6, 7.2$  Hz, 2H), 7.19-7.10 (m, 4H), 7.08 (d,  $J = 7.6$  Hz, 1H), 6.87 (d,  $J = 13.2$  Hz, 1H), 6.07 (dd,  $J = 13.2, 9.2$  Hz, 1H), 4.65 (d,  $J = 6.8$  Hz, 1H), 3.63 (dd,  $J = 9.2, 6.8$  Hz, 1H), 2.44 (s, 3H), 2.41 (s, 3H), 2.08 (brs, 1H);  $^{13}\text{C}$  NMR (100 MHz,  $\text{CDCl}_3$ )  $\delta$  166.9, 141.0, 139.5, 138.2, 137.3, 136.2, 133.9, 132.9, 132.8, 132.7, 131.5, 130.5, 129.2, 129.0, 128.91, 128.90, 128.8, 128.6, 128.2, 127.4, 124.55, 124.52, 72.0, 49.1, 21.6, 21.5. HRMS  $m/z$  Calcd. For  $\text{C}_{31}\text{H}_{28}\text{NO}$  ( $\text{M} + \text{H}^+$ ): 430.2171; Found: 430.2152.

### Compound 8c

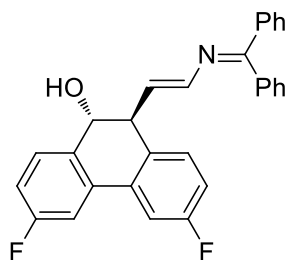

Yellow solid; m.p. 69-72 °C; IR (KBr) 3428, 1613, 1578, 1450, 1428, 1171  $\text{cm}^{-1}$ ;  $^1\text{H}$  NMR (400 MHz,  $\text{CDCl}_3$ )  $\delta$  7.63 (d,  $J = 7.6$  Hz, 2H), 7.48-7.42 (m, 4H), 7.40 (t,  $J = 7.2$  Hz, 1H), 7.37-7.27 (m, 4H), 7.20 (dd,  $J = 8.4, 6.0$  Hz, 1H), 7.14-7.08 (m, 2H), 7.01 (td,  $J = 8.4, 2.4$  Hz, 1H), 6.96 (td,  $J = 8.4, 2.4$  Hz, 1H), 6.78 (d,  $J = 13.2$  Hz, 1H), 6.02 (dd,  $J = 13.2, 9.2$  Hz, 1H), 4.63 (d,  $J = 6.8$  Hz, 1H), 3.62 (dd,  $J = 9.2, 6.8$  Hz, 1H), 2.43 (s, 1H);  $^{13}\text{C}$  NMR (100 MHz,  $\text{CDCl}_3$ )  $\delta$  167.7, 164.5, 163.9, 162.0, 161.5, 141.5, 139.2, 136.0, 134.13, 134.10, 134.05, 134.03, 133.98, 133.96, 133.91, 133.88, 132.51, 132.48, 131.64, 131.61, 130.9, 130.8, 130.7, 130.1, 129.4, 129.3, 129.0, 128.7,

128.6, 128.3, 115.6, 115.5, 115.4, 115.3, 111.1, 111.0, 110.8, 110.76, 71.3, 48.5;  
HRMS  $m/z$  Calcd. For  $C_{29}H_{22}NOF_2$  ( $M + H^+$ ): 438.1669; Found: 438.1663.

### Compound 8d

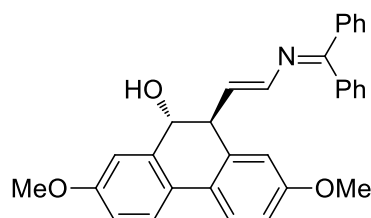

Yellow solid; m.p. 69-72 °C; IR (KBr) 3431, 1610, 1485, 1248  $cm^{-1}$ ;  $^1H$  NMR (400 MHz,  $CDCl_3$ )  $\delta$  7.65 (d,  $J = 7.6$  Hz, 2H), 7.61 (d,  $J = 8.4$  Hz, 1H), 7.60 (d,  $J = 8.4$  Hz, 1H), 7.50-7.30 (m, 6H), 7.18-7.12 (m, 2H), 7.05 (d,  $J = 2.4$  Hz, 1H), 6.93-6.79 (m, 4H), 6.10 (dd,  $J = 13.2, 9.2$  Hz, 1H), 4.62 (d,  $J = 7.2$  Hz, 1H), 3.84 (s, 3H), 3.81 (s, 3H), 3.61 (dd,  $J = 9.2, 7.2$  Hz, 1H), 2.32 (brs, 1H);  $^{13}C$  NMR (100 MHz,  $CDCl_3$ )  $\delta$  167.1, 159.1, 159.0, 141.3, 139.4, 137.4, 136.5, 136.1, 130.9, 130.5, 129.0, 128.9, 128.8, 128.6, 128.2, 125.9, 125.6, 124.6, 124.5, 114.65, 114.56, 113.2, 112.0, 72.2, 55.4, 49.6. HRMS  $m/z$  Calcd. For  $C_{31}H_{28}NO_3$  ( $M + H^+$ ): 462.2069; Found: 462.2044.

### Compound 8e

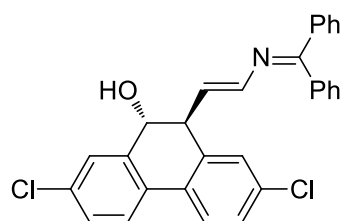

Yellow solid; m.p. 94-96 °C; IR (KBr) 3424, 1578, 1553, 1468, 1444, 1095  $cm^{-1}$ ;  $^1H$  NMR (400 MHz,  $CDCl_3$ )  $\delta$  7.64 (d,  $J = 8.0$  Hz, 2H), 7.57 (d,  $J = 8.0$  Hz, 1H), 7.56 (d,  $J = 8.0$  Hz, 1H), 7.52-7.44 (m, 4H), 7.40 (d,  $J = 7.6$  Hz, 1H), 7.37-7.29 (m, 3H), 7.28-7.20 (m, 2H), 7.19-7.12 (m, 2H), 6.84 (d,  $J = 13.2$  Hz, 1H), 5.99 (dd,  $J = 12.8, 9.2$  Hz, 1H), 4.55 (d,  $J = 8.0$  Hz, 1H), 3.52 (dd,  $J = 9.2, 8.0$  Hz, 1H), 2.98 (s, 1H);  $^{13}C$  NMR (100 MHz,  $CDCl_3$ )  $\delta$  168.2, 142.5, 139.2, 138.5, 137.7, 136.0, 134.3, 134.2, 130.9, 130.8, 130.5, 129.2, 129.1, 129.0, 128.9, 128.74, 128.70, 128.3, 128.1, 127.0,

125.2, 125.1, 71.1, 49.0. HRMS  $m/z$  Calcd. For  $C_{29}H_{22}Cl_2NO$  ( $M + H^+$ ): 470.1078; Found: 470.1019.

### Compound 8f

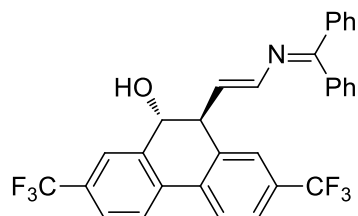

Yellow solid; m.p. 76-78 °C; IR (KBr) 3412, 1621, 1557, 1446, 1327, 1121  $cm^{-1}$ ;  $^1H$  NMR (400 MHz,  $CDCl_3$ )  $\delta$  7.90-7.80 (m, 3H), 7.70-7.64 (m, 3H), 7.61 (d,  $J = 8.0$  Hz, 1H), 7.56 (s, 1H), 7.50-7.38 (m, 4H), 7.34 (dd,  $J = 8.0, 7.2$  Hz, 2H), 7.20-7.13 (m, 2H), 6.90 (d,  $J = 13.2$  Hz, 1H), 6.06 (dd,  $J = 13.2, 9.2$  Hz, 1H), 4.72 (d,  $J = 8.4$  Hz, 1H), 3.67 (dd,  $J = 9.2, 8.4$  Hz, 1H), 2.77 (brs, 1H);  $^{13}C$  NMR (100 MHz,  $CDCl_3$ )  $\delta$  168.6, 142.9, 139.1, 138.2, 137.4, 136.0, 135.3, 135.0, 131.2, 131.0, 130.9, 129.23, 129.17, 128.71, 128.69, 128.4, 128.3, 125.9 (q,  $J = 3.7$  Hz), 125.6 (q,  $J = 3.7$  Hz), 124.9 (q,  $J = 3.6$  Hz), 124.7, 124.2 (q,  $J = 3.8$  Hz), 70.9, 48.9; HRMS  $m/z$  Calcd. For  $C_{31}H_{22}NOF_6$  ( $M + H^+$ ): 538.1606; Found: 538.1604.

### Compound 8g

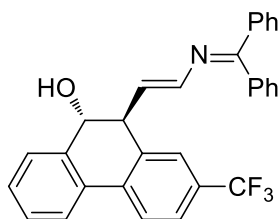

Yellow solid; m.p. 74-77 °C; IR (KBr) 3424, 1618, 1556, 1331, 1120  $cm^{-1}$ ;  $^1H$  NMR (400 MHz,  $CDCl_3$ )  $\delta$  7.83 (d,  $J = 8.0$  Hz, 1H), 7.76 (d,  $J = 7.6$  Hz, 1H), 7.64 (d,  $J = 8.0$  Hz, 2H), 7.57 (d,  $J = 8.4$  Hz, 1H), 7.52-7.28 (m, 10H), 7.17-7.11 (m, 2H), 6.84 (d,  $J = 12.8$  Hz, 1H), 6.02 (dd,  $J = 12.8, 8.8$  Hz, 1H), 4.67 (d,  $J = 6.8$  Hz, 1H), 3.68 (dd,  $J = 8.8, 6.8$  Hz, 1H), 2.72 (brs, 1H);  $^{13}C$  NMR (100 MHz,  $CDCl_3$ )  $\delta$  167.9, 141.9, 139.3, 137.0, 136.7, 136.4, 136.1, 131.6, 130.7, 129.4, 129.1, 129.0, 128.8, 128.6, 128.3,

127.7, 126.1 (q,  $J = 3.7$  Hz), 124.7 (q,  $J = 3.8$  Hz), 124.4, 124.2, 71.6, 49.0; HRMS  $m/z$  Calcd. For  $C_{30}H_{23}NOF_3$  ( $M + H^+$ ): 470.1732; Found: 470.1721.

### Compound 8h

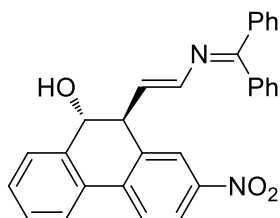

Yellow solid; m.p. 82-85 °C; IR (KBr) 3424, 1519, 1446  $cm^{-1}$ ;  $^1H$  NMR (600 MHz,  $CDCl_3$ )  $\delta$  8.15 (dd,  $J = 9.0, 2.4$  Hz, 1H), 8.09 (d,  $J = 2.4$  Hz, 1H), 7.87 (d,  $J = 9.0$  Hz, 1H), 7.78 (d,  $J = 7.2$  Hz, 1H), 7.62 (d,  $J = 7.8$  Hz, 2H), 7.51 (d,  $J = 7.2$  Hz, 1H), 7.50-7.36 (m, 6H), 7.31 (dd,  $J = 7.8, 7.2$  Hz, 2H), 7.15-7.10 (m, 2H), 6.83 (d,  $J = 13.2$  Hz, 1H), 5.98 (dd,  $J = 13.2, 9.0$  Hz, 1H), 4.71 (d,  $J = 6.6$  Hz, 1H), 3.72 (dd,  $J = 9.0, 6.6$  Hz, 1H), 2.55 (s, 1H);  $^{13}C$  NMR (100 MHz,  $CDCl_3$ )  $\delta$  168.3, 147.3, 142.2, 139.3, 139.1, 137.7, 137.4, 136.0, 130.9, 130.8, 130.2, 129.2, 129.14, 129.12, 128.8, 128.7, 128.4, 128.3, 127.8, 125.0, 124.6, 124.4, 123.0, 71.4, 49.0; HRMS  $m/z$  Calcd. For  $C_{29}H_{23}N_2O_3$  ( $M + H^+$ ): 447.1709; Found: 447.1704.

### Compound 8i

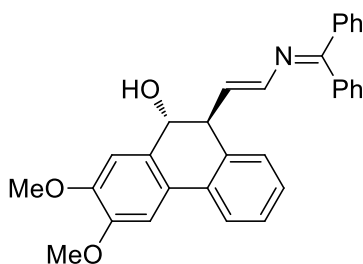

Yellow solid; m.p. 65-68 °C; IR (KBr) 3432, 1516, 1489, 1444, 1277, 1145  $cm^{-1}$ ;  $^1H$  NMR (400 MHz,  $CDCl_3$ )  $\delta$  7.69-7.60 (m, 3H), 7.47-7.41 (m, 3H), 7.38 (t,  $J = 7.2$  Hz, 1H), 7.35-7.18 (m, 6H), 7.17-7.11 (m, 2H), 7.02 (s, 1H), 6.87 (d,  $J = 13.2$  Hz, 1H), 6.10 (dd,  $J = 13.2, 9.2$  Hz, 1H), 4.61 (d,  $J = 6.8$  Hz, 1H), 3.97 (s, 3H), 3.91 (s, 3H), 3.64 (dd,  $J = 9.2, 6.8$  Hz, 1H), 2.43 (brs, 1H);  $^{13}C$  NMR (100 MHz,  $CDCl_3$ )  $\delta$  167.0, 149.2, 149.1, 140.9, 139.3, 136.1, 135.1, 132.8, 131.2, 130.5, 129.6, 129.2, 128.91,

128.86, 128.7, 128.5, 128.2, 127.7, 127.4, 125.4, 123.0, 110.3, 107.2, 71.7, 56.2, 56.0, 49.4; HRMS  $m/z$  Calcd. For  $C_{31}H_{28}NO_3$  ( $M + H^+$ ): 462.2069; Found: 462.2069.

### Compound 8j

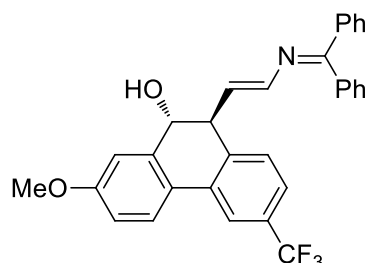

Yellow solid; m.p. 69-72 °C; IR (KBr) 3419, 1610, 1419, 1336, 1267, 1119  $cm^{-1}$ ;  $^1H$  NMR (400 MHz,  $CDCl_3$ )  $\delta$  7.90 (s, 1H), 7.69 (d,  $J = 8.8$  Hz, 1H), 7.64 (d,  $J = 7.2$  Hz, 2H), 7.48-7.36 (m, 5H), 7.36-7.28 (m, 3H), 7.15-7.08 (m, 2H), 7.06 (d,  $J = 2.4$  Hz, 1H), 6.94 (dd,  $J = 8.4, 2.4$  Hz, 1H), 6.82 (d,  $J = 13.2$  Hz, 1H), 6.06 (dd,  $J = 13.2, 9.2$  Hz, 1H), 4.64 (d,  $J = 7.2$  Hz, 1H), 3.84 (s, 3H), 3.67 (dd,  $J = 9.2, 7.2$  Hz, 1H), 2.63 (brs, 1H);  $^{13}C$  NMR (100 MHz,  $CDCl_3$ )  $\delta$  167.8, 160.4, 141.8, 141.7, 139.2, 138.9, 138.4, 136.0, 133.8, 130.7, 129.6, 129.5, 129.0, 128.7, 128.6, 128.3, 125.6, 124.3, 123.6 (q,  $J = 3.7$  Hz), 119.9 (q,  $J = 3.7$  Hz), 114.8, 112.3, 71.7, 55.4, 49.1; HRMS  $m/z$  Calcd. For  $C_{31}H_{25}NO_2F_3$  ( $M + H^+$ ): 500.1837; Found: 500.1835.

### Compound 8k

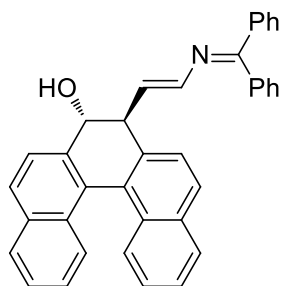

Yellow solid; m.p. 146-148 °C; IR (KBr) 3432, 1583, 1552, 1505, 1443, 1318, 1090  $cm^{-1}$ ;  $^1H$  NMR (400 MHz,  $CDCl_3$ )  $\delta$  8.01 (d,  $J = 8.4$  Hz, 1H), 7.98 (d,  $J = 8.4$  Hz, 1H), 7.94-7.88 (m, 3H), 7.78 (d,  $J = 7.6$  Hz, 2H), 7.67 (d,  $J = 8.4$  Hz, 1H), 7.59 (d,  $J = 8.8$  Hz, 1H), 7.52-7.35 (m, 9H), 7.30-7.19 (m, 4H), 7.14 (d,  $J = 12.8$  Hz, 1H), 6.41 (dd,  $J = 12.8, 10.4$  Hz, 1H), 4.72 (d,  $J = 12.0$  Hz, 1H), 3.56 (dd,  $J = 12.0, 10.4$  Hz, 1H), 2.50



(s, 1H);  $^{13}\text{C}$  NMR (100 MHz,  $\text{CDCl}_3$ )  $\delta$  167.9, 144.2, 139.4, 139.3, 136.1, 136.0, 133.51, 133.50, 130.9, 130.43, 130.36, 130.2, 130.0, 129.2, 129.1, 128.8, 128.73, 128.69, 128.5, 128.41, 128.37, 128.34, 128.2, 127.8, 127.3, 125.4, 125.3, 125.2, 125.1, 125.0, 121.5, 72.0, 51.2. HRMS  $m/z$  Calcd. For  $\text{C}_{37}\text{H}_{28}\text{NO}$  ( $\text{M} + \text{H}^+$ ): 502.2171; Found: 502.2145.

7.685  
7.673  
7.671  
7.470  
7.468  
7.463  
7.459  
7.409  
7.360  
7.347  
7.333  
7.282  
7.170  
6.912  
6.890

6.143  
6.127  
6.121  
6.105

4.698  
4.688

3.698  
3.686  
3.683  
3.671

2.414

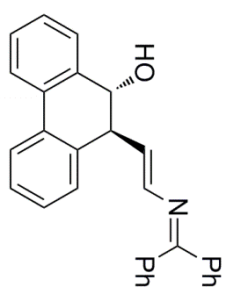

Table 2, entry 1, 8a

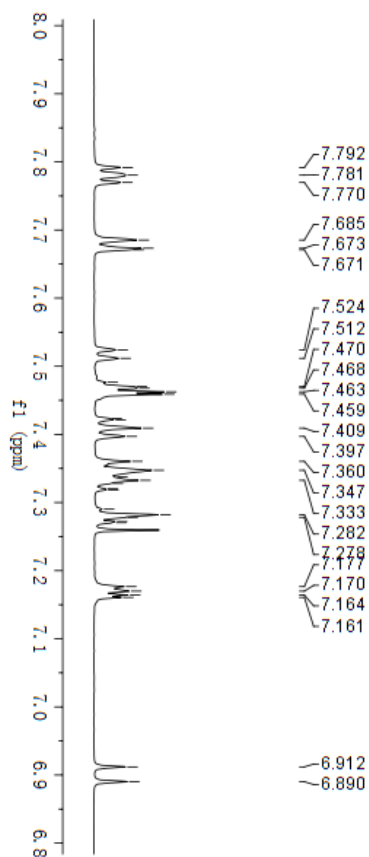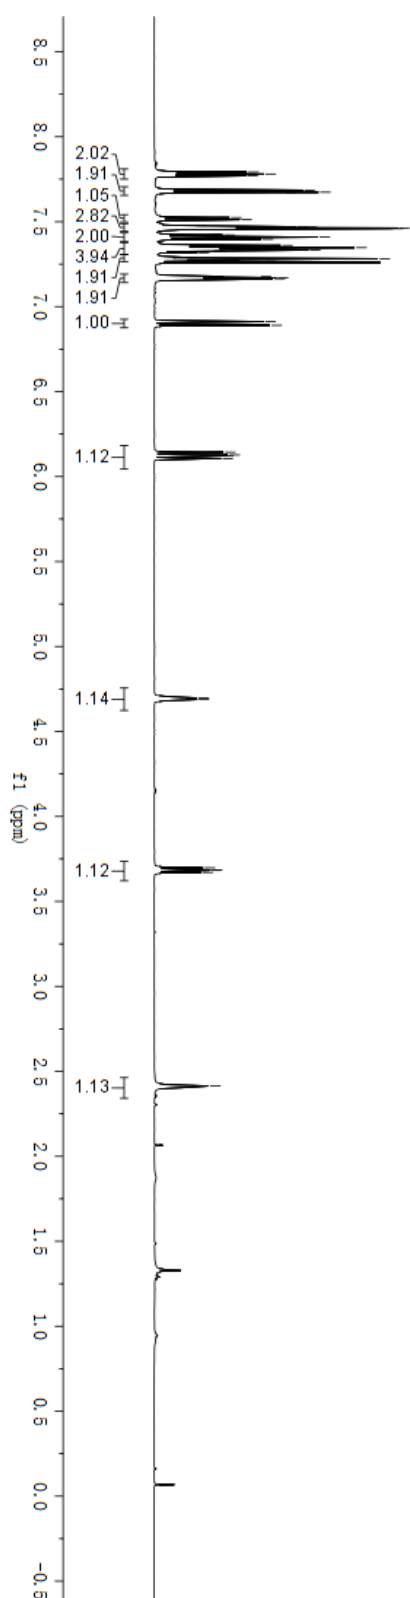

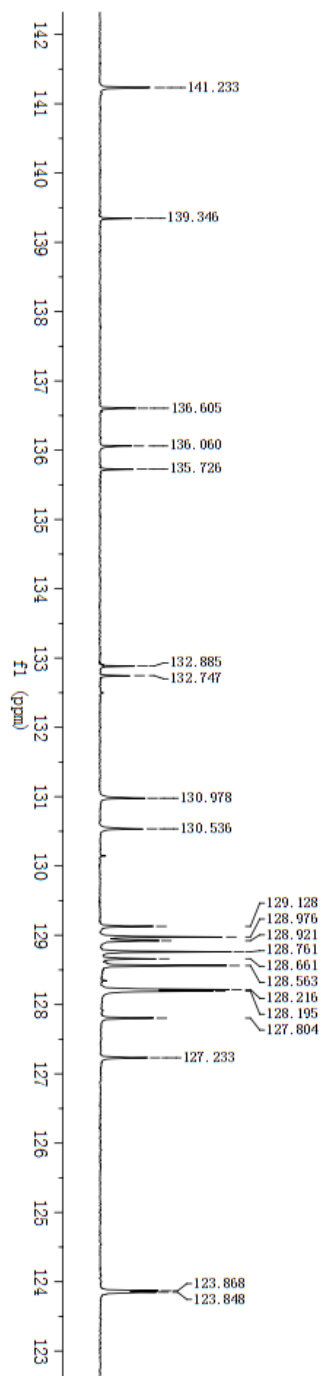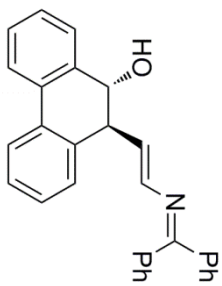

**Table 2, entry 1, 8a**

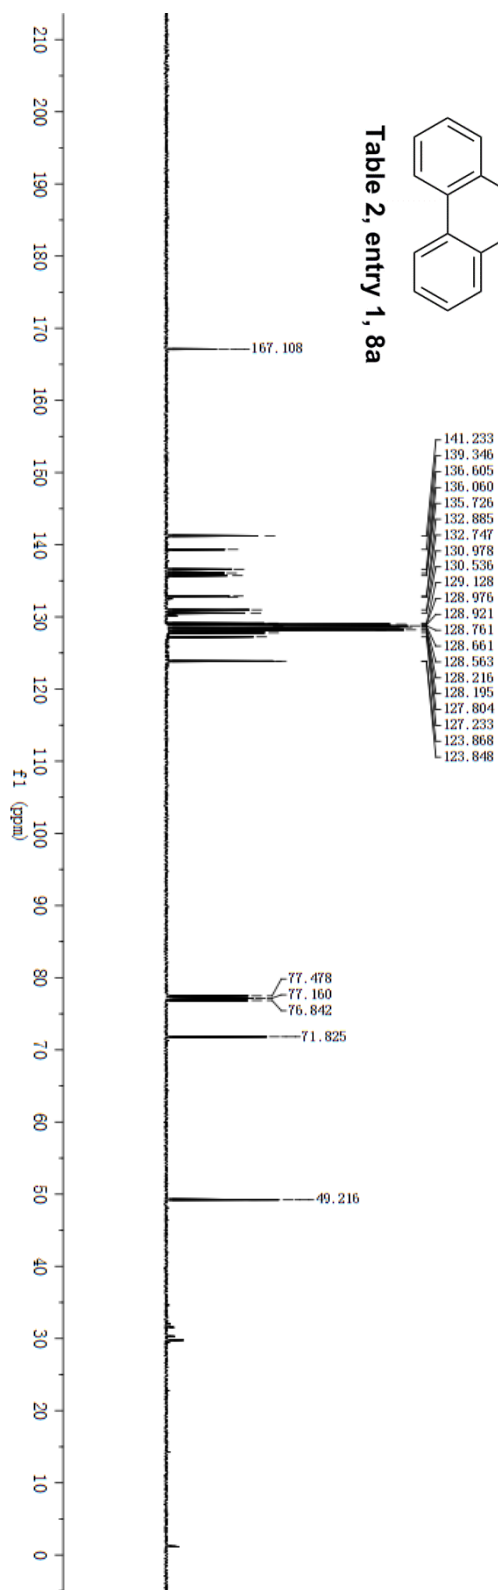

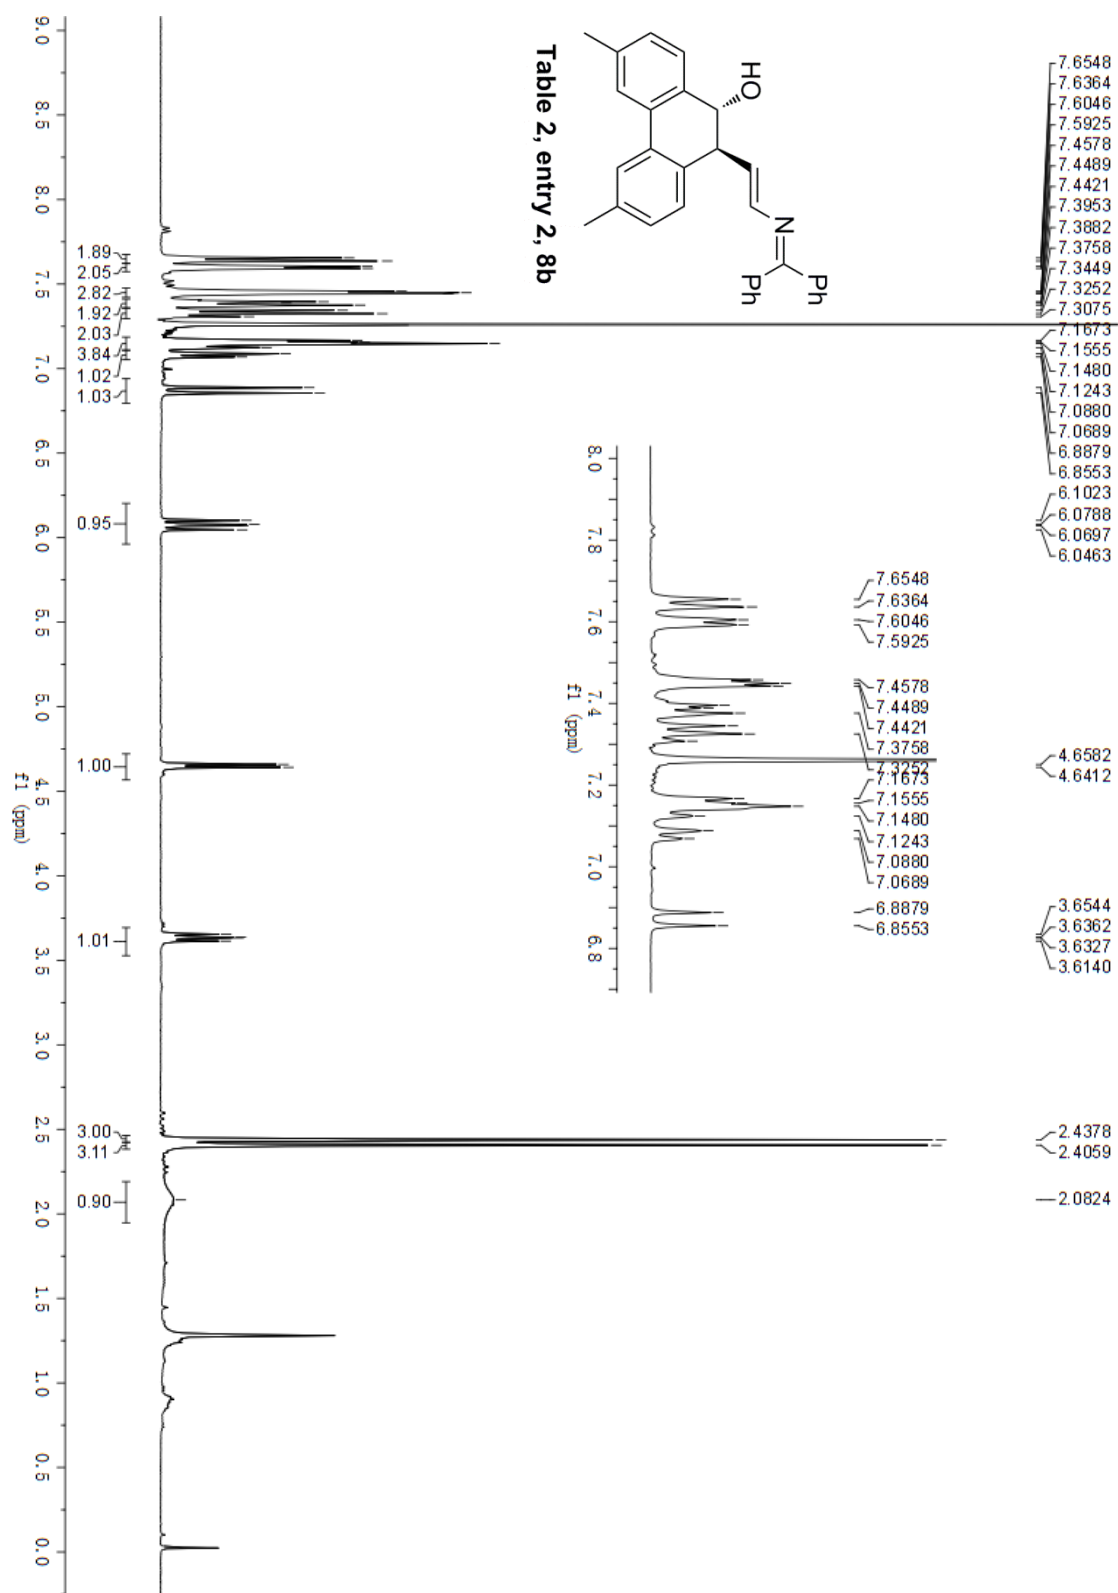

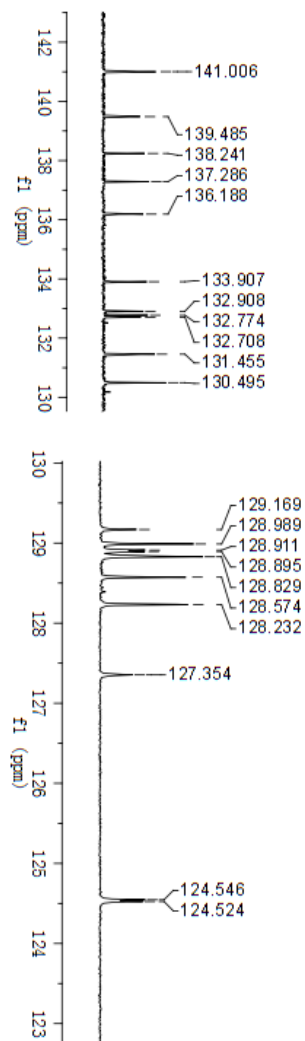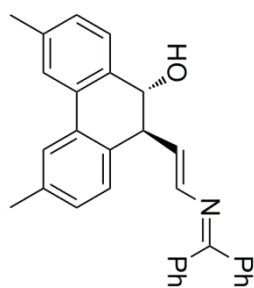

Table 2, entry 2, 8b

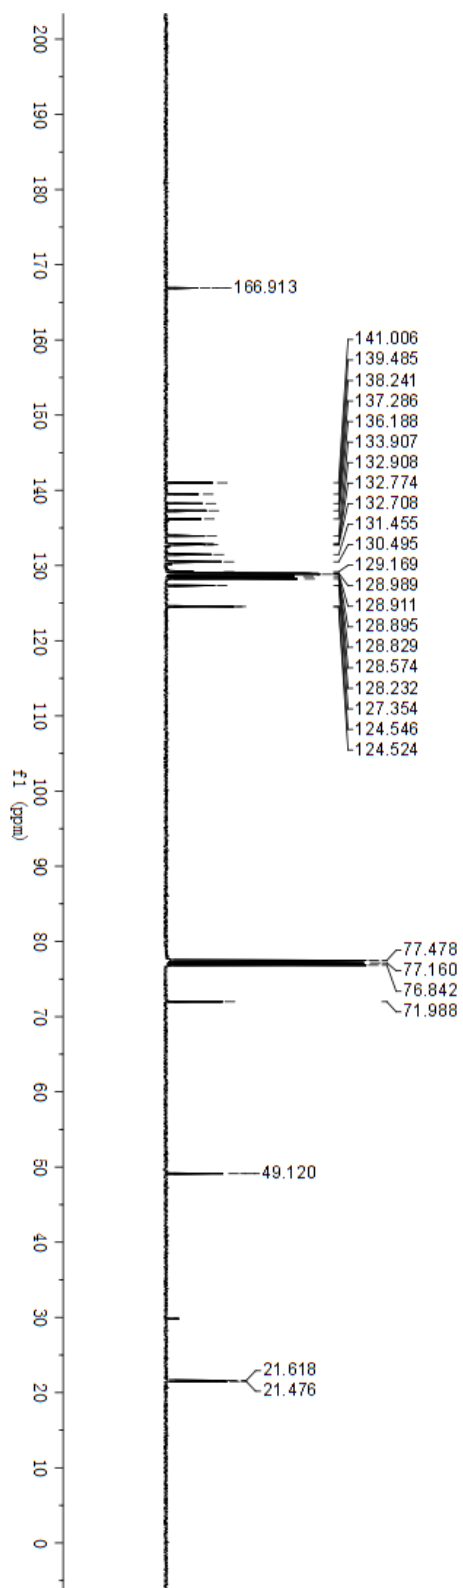

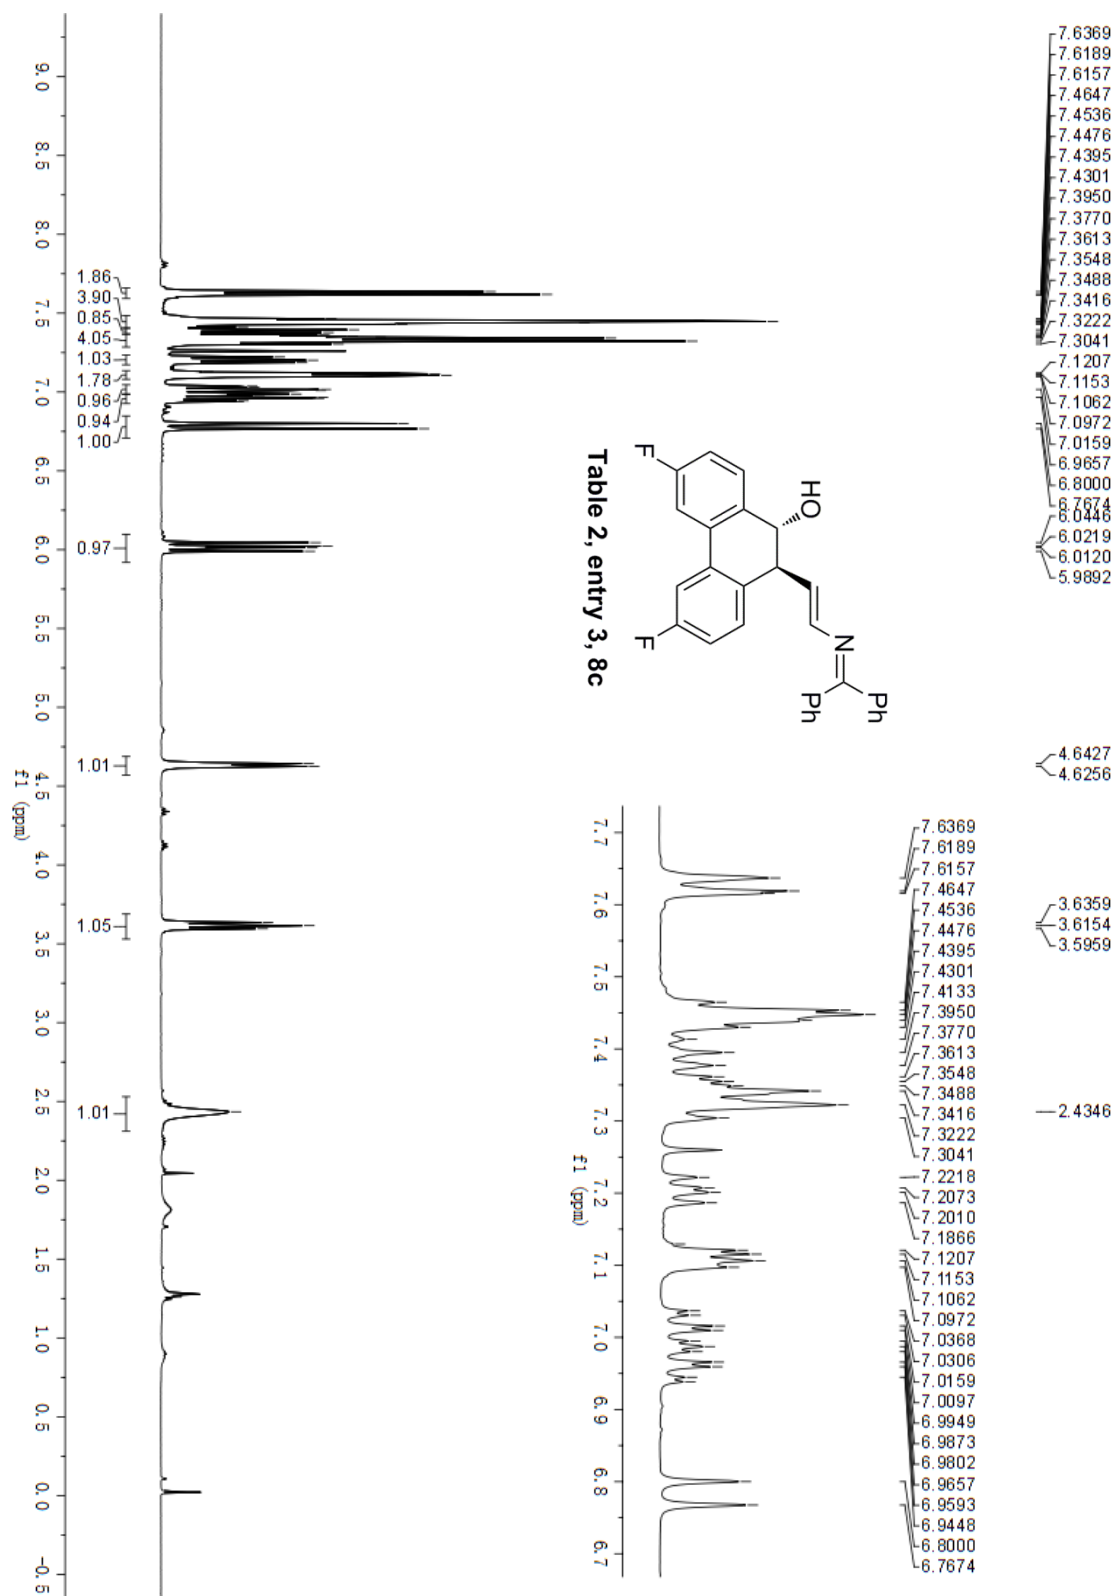

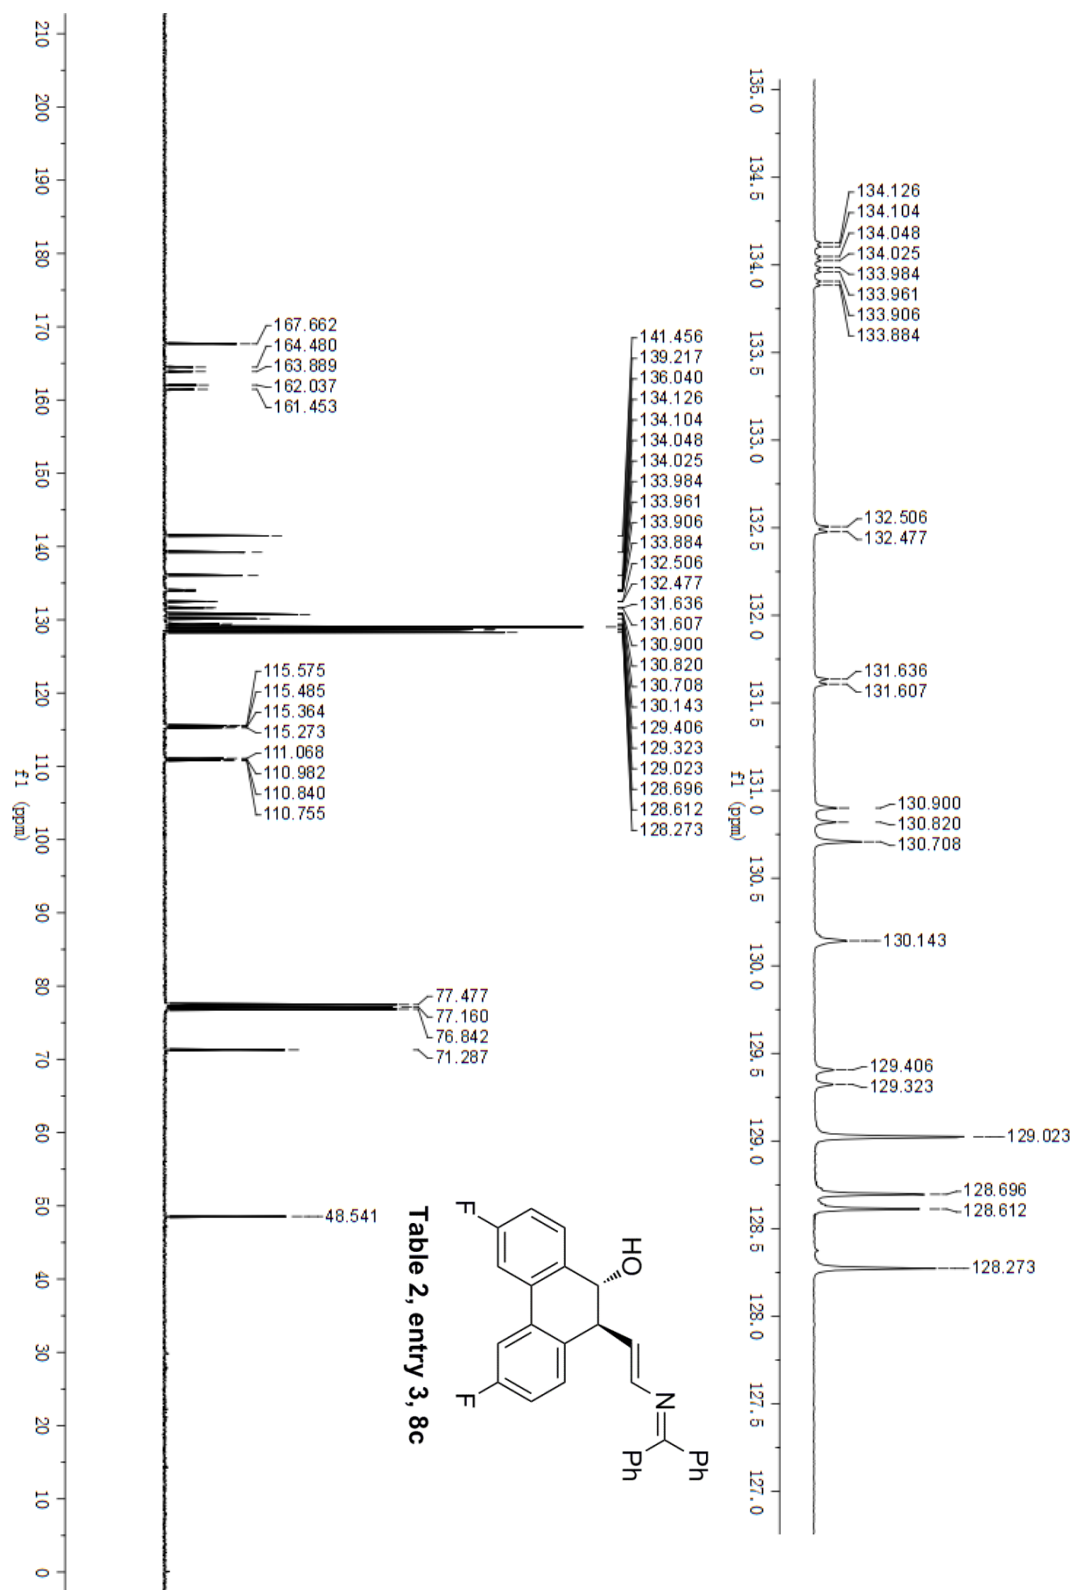

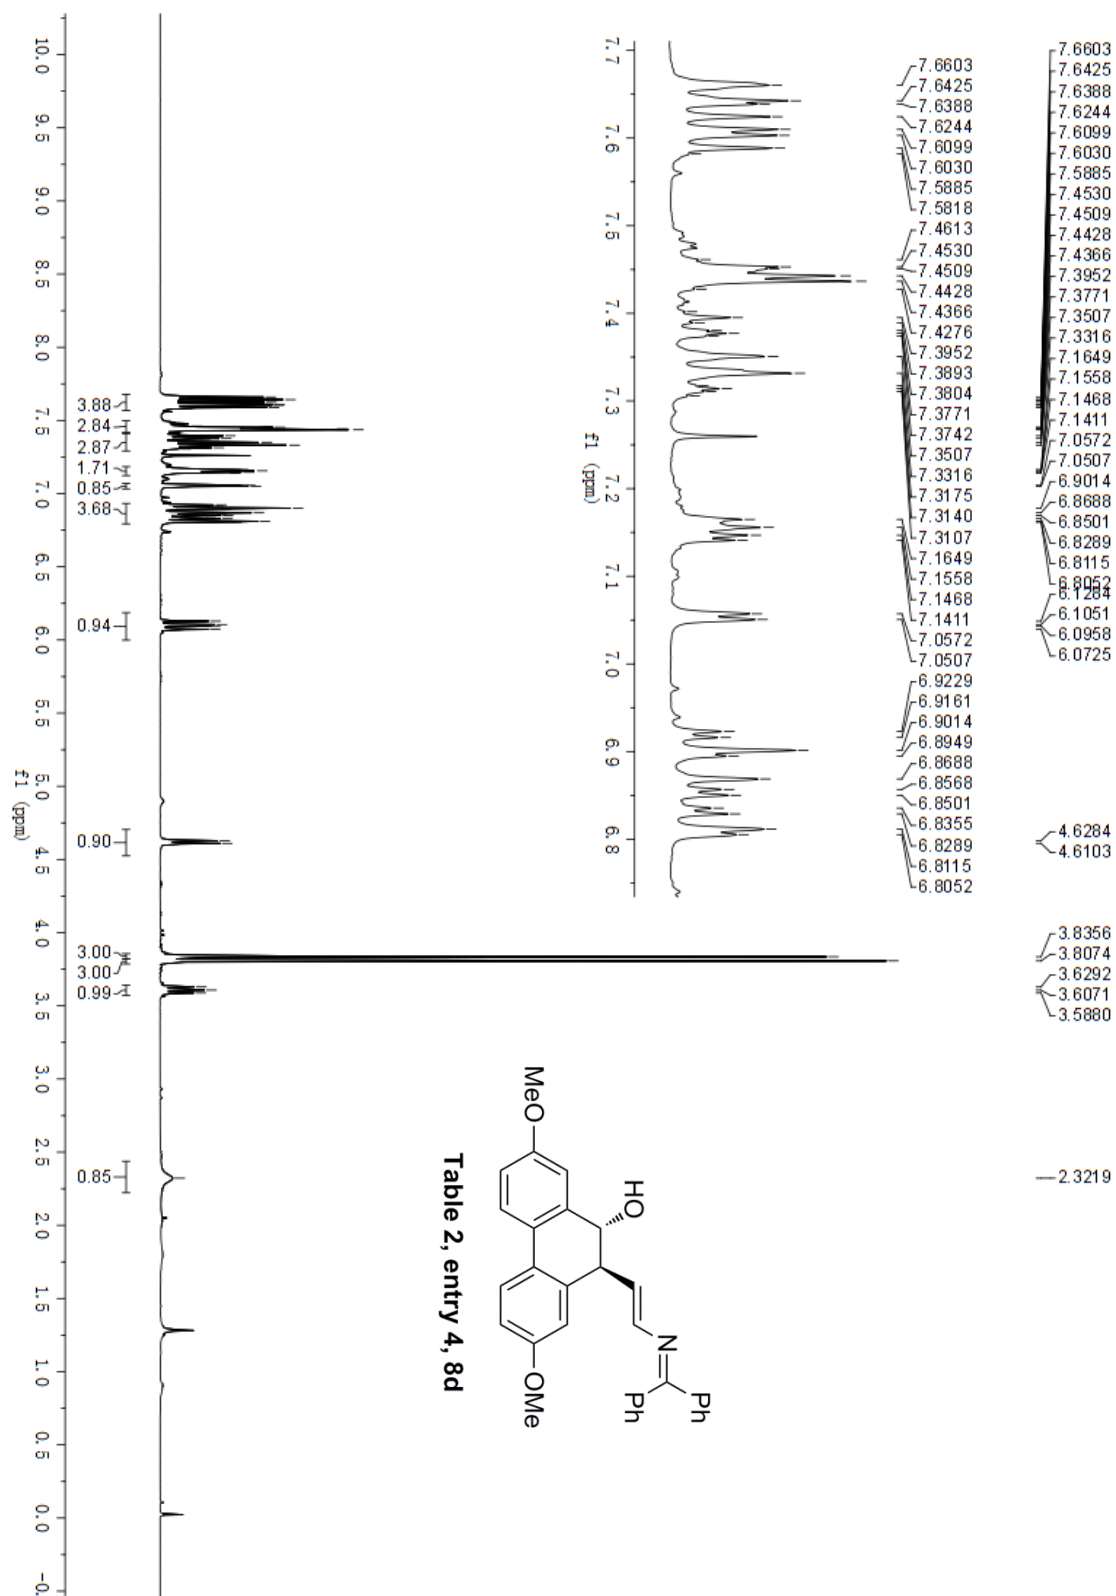



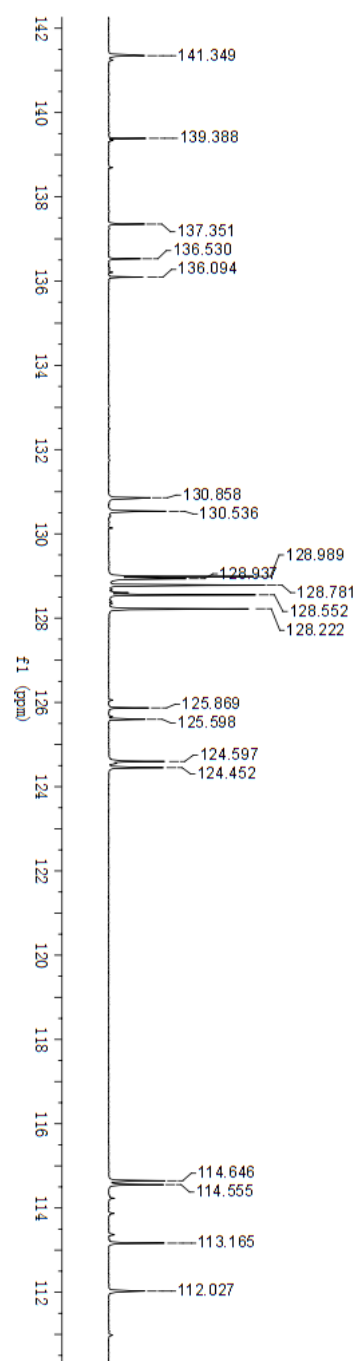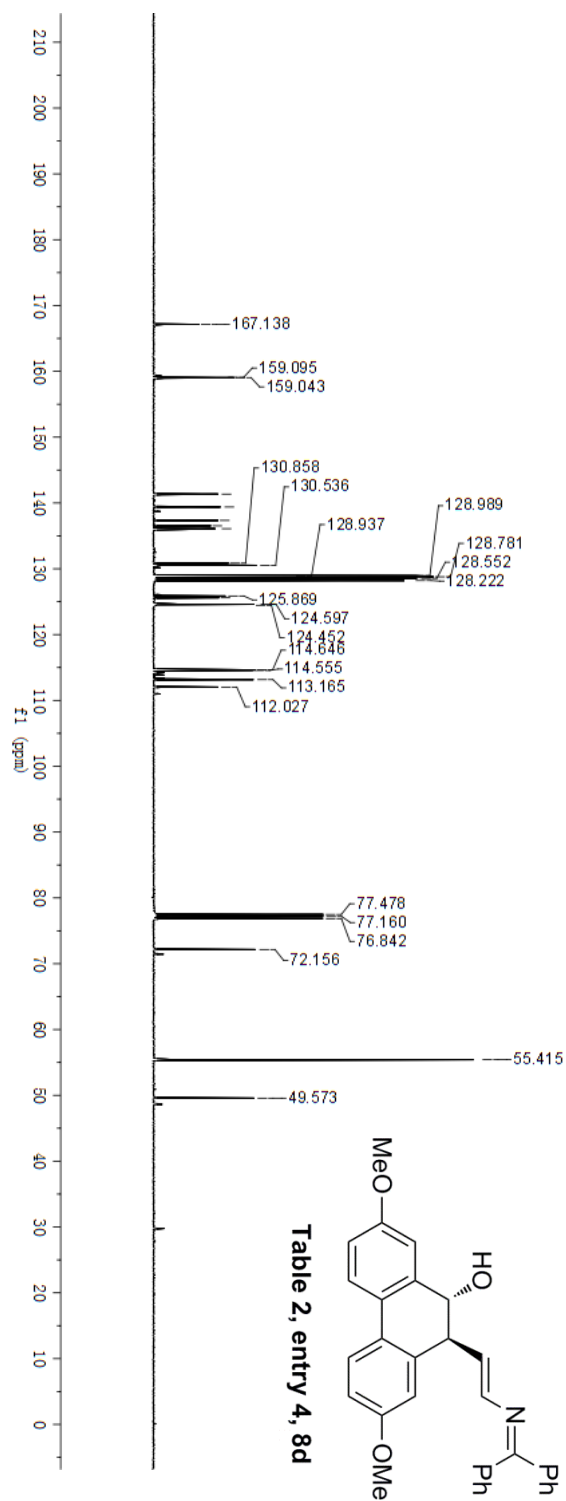

7.652  
7.632  
7.477  
7.472  
7.468  
7.464  
7.456  
7.451  
7.353  
7.333  
7.222  
6.860  
6.827

6.019  
5.996  
5.987  
5.964

4.588  
4.563  
4.543

3.538  
3.517  
3.495

2.985

7.652  
7.632  
7.585  
7.572  
7.565  
7.552

7.477  
7.472  
7.468  
7.464  
7.456  
7.451  
7.409  
7.390  
7.353  
7.333  
7.324  
7.265  
7.222  
7.167  
7.158  
7.148  
7.143

6.860  
6.827

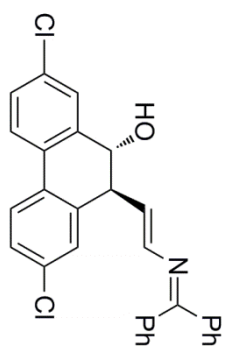

Table 2, entry 5, 8e

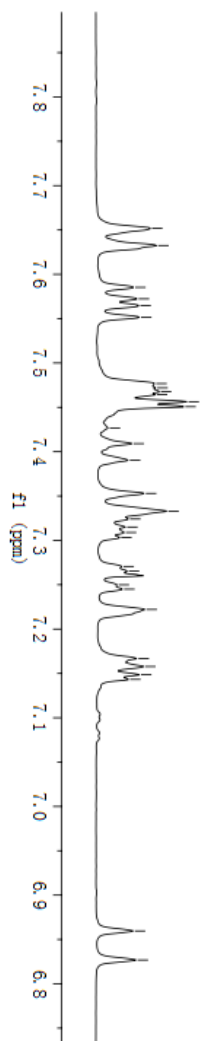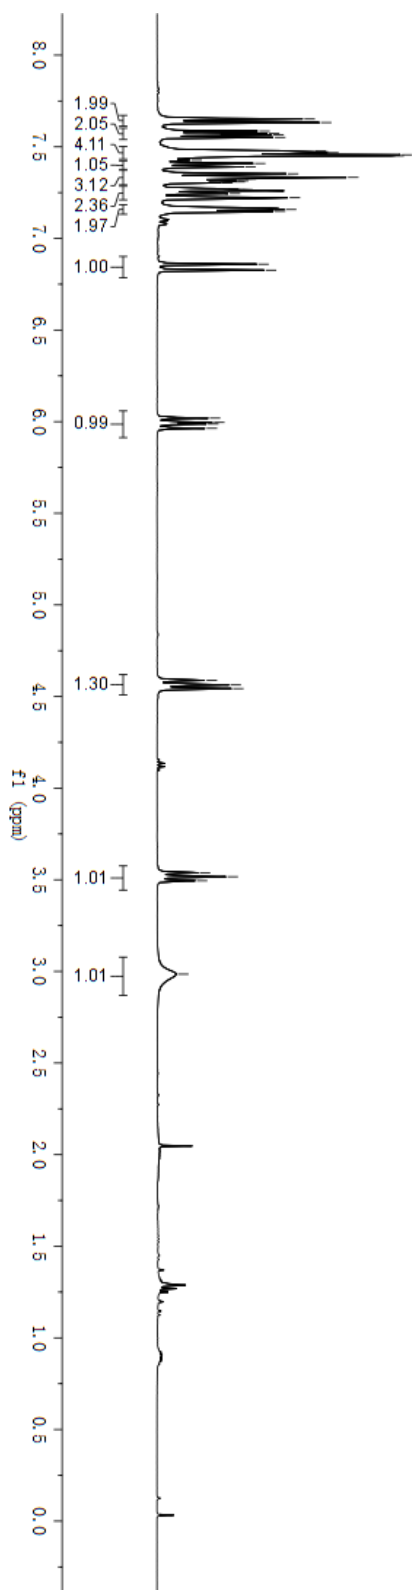

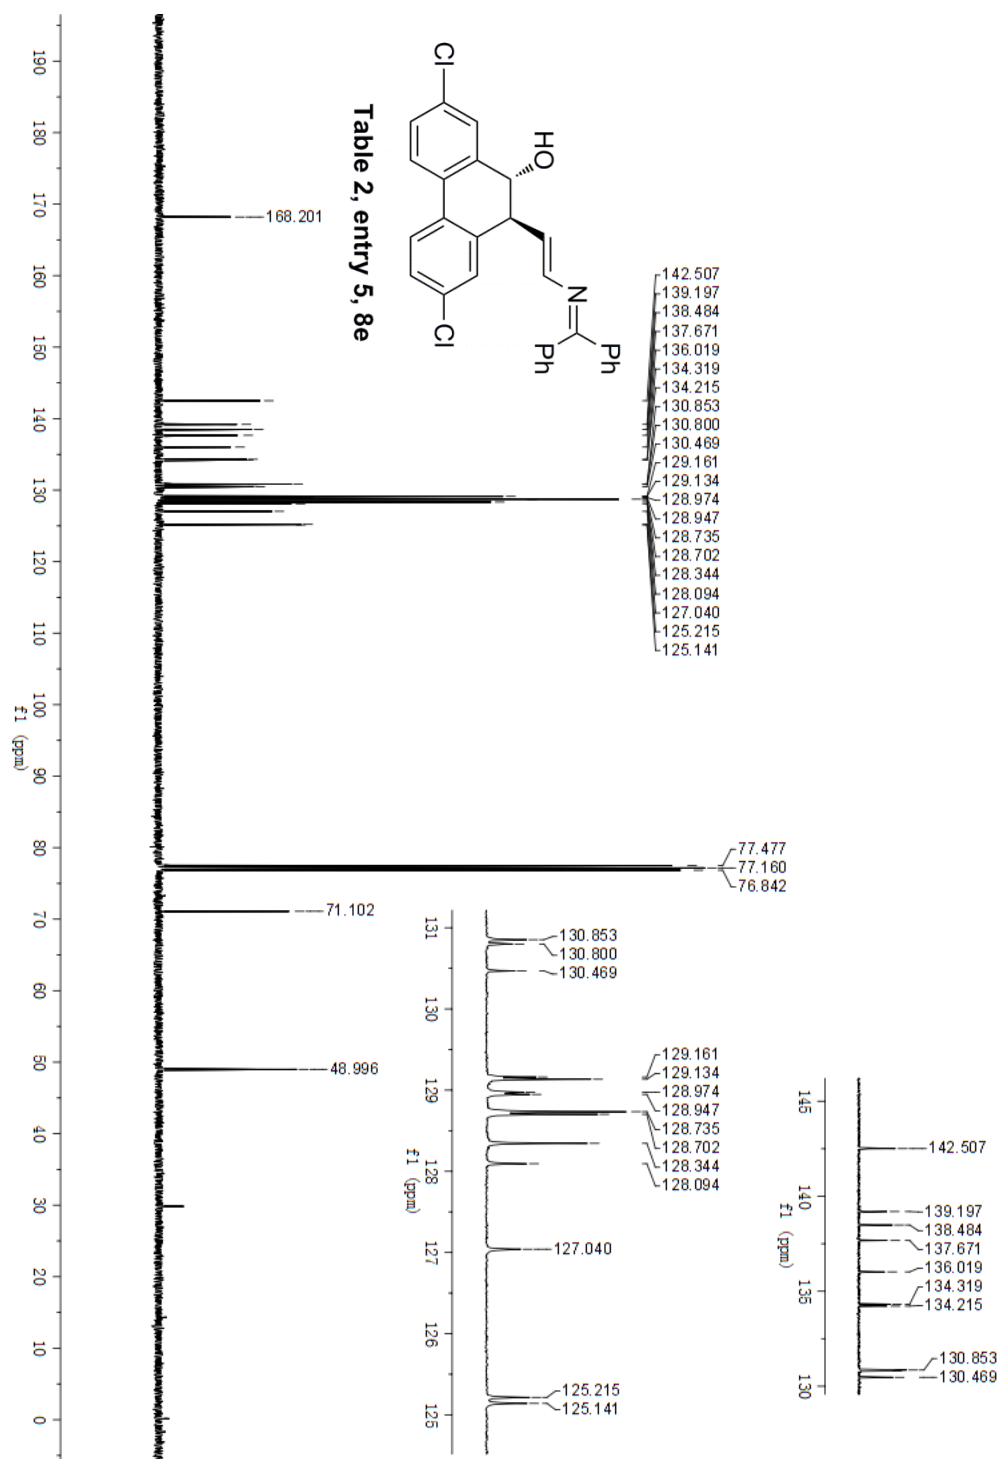

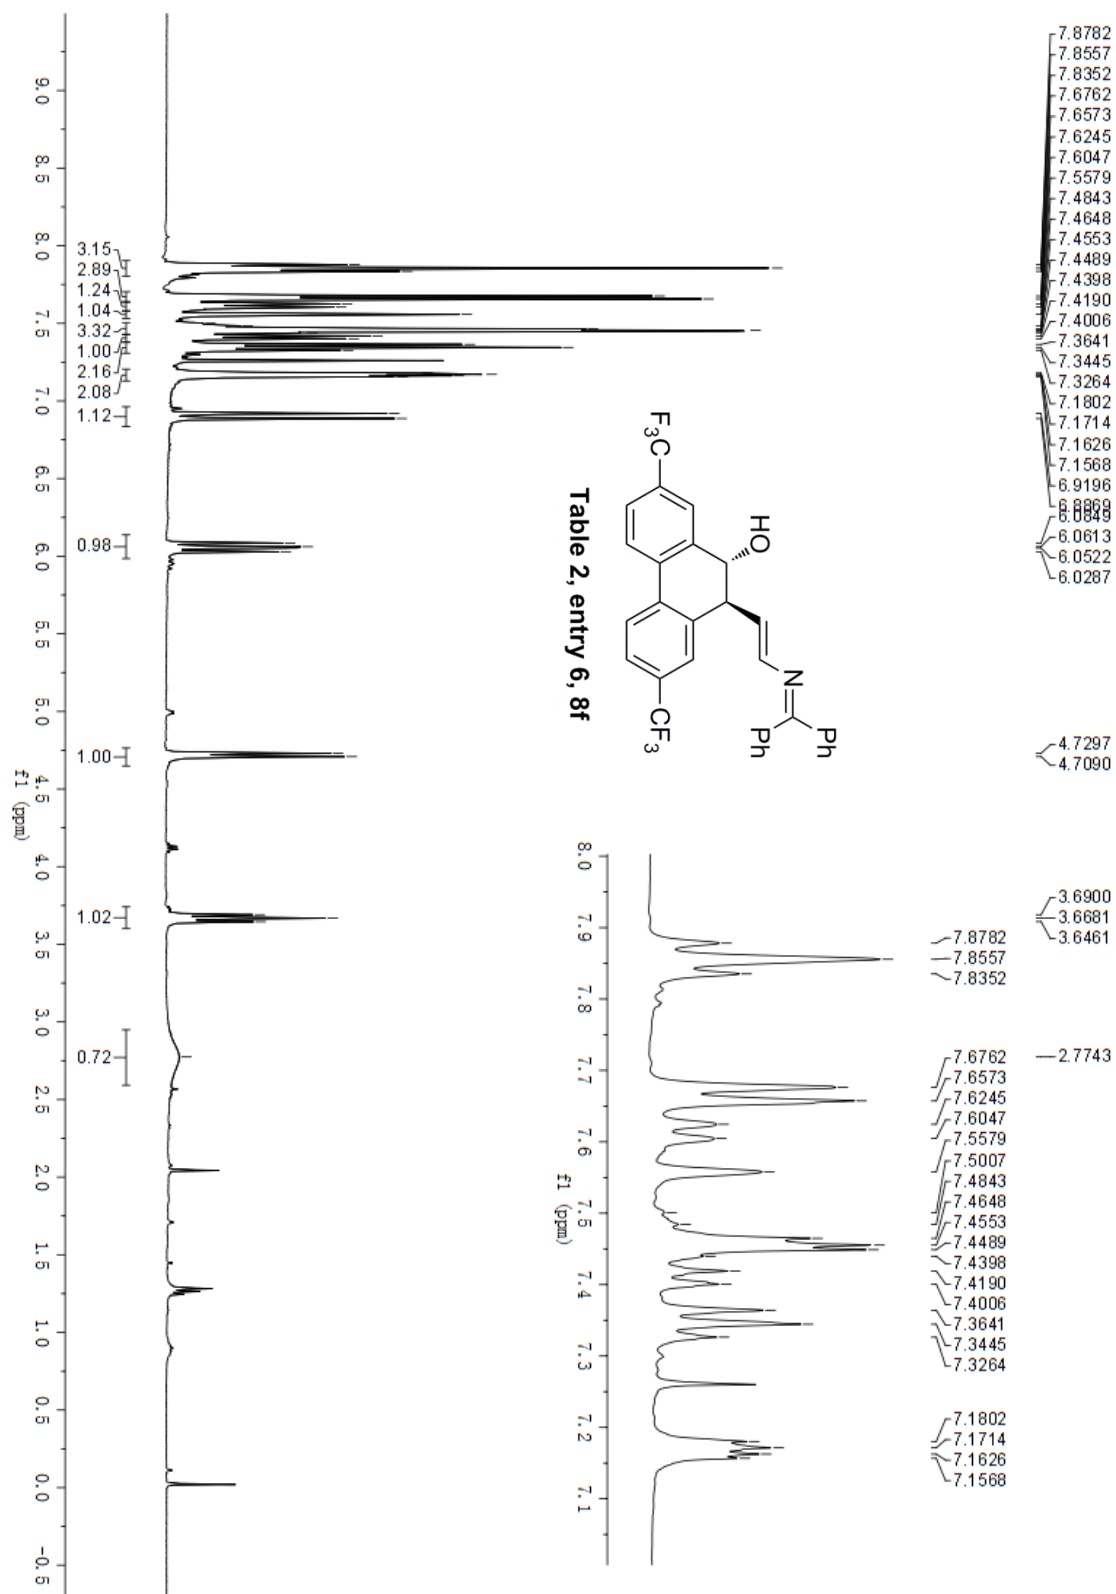

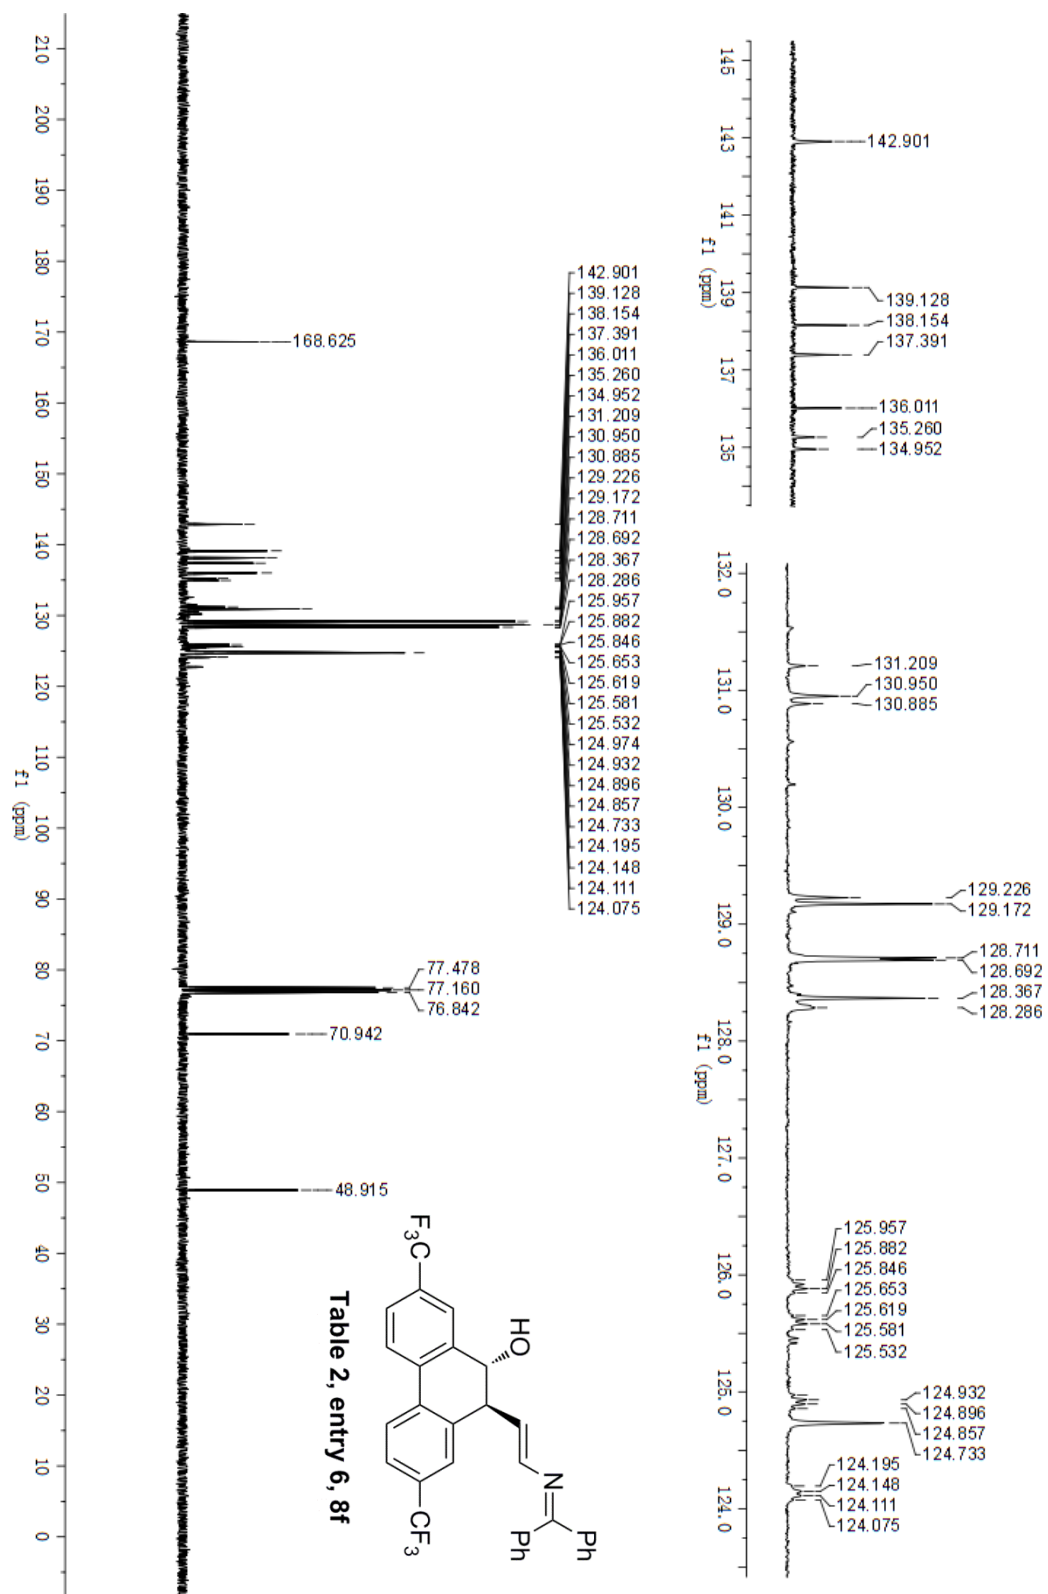

7.655  
7.637  
7.633  
7.496  
7.477  
7.473  
7.468  
7.460  
7.452  
7.405  
7.350  
7.330  
7.158  
7.150  
7.141  
7.134  
6.852  
6.820

6.048  
6.025  
6.015  
5.993

4.683  
4.666

3.693  
3.675  
3.654

2.723

7.839  
7.819  
7.768  
7.749

7.655  
7.637  
7.633  
7.576  
7.555

7.496  
7.477  
7.473  
7.468  
7.460  
7.452  
7.405  
7.387  
7.359  
7.350  
7.330  
7.168  
7.158  
7.150  
7.144  
7.141  
7.134

6.852  
6.820

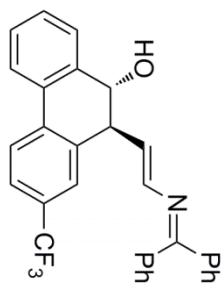

Table 2, entry 7, 8g

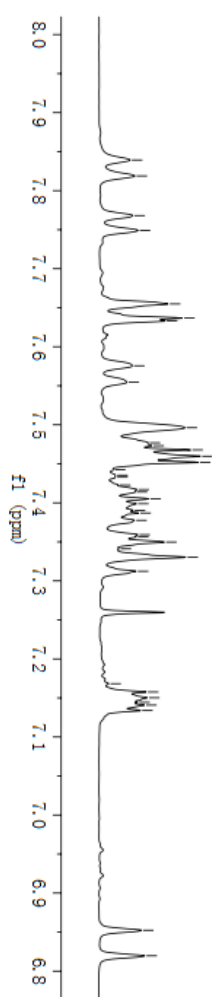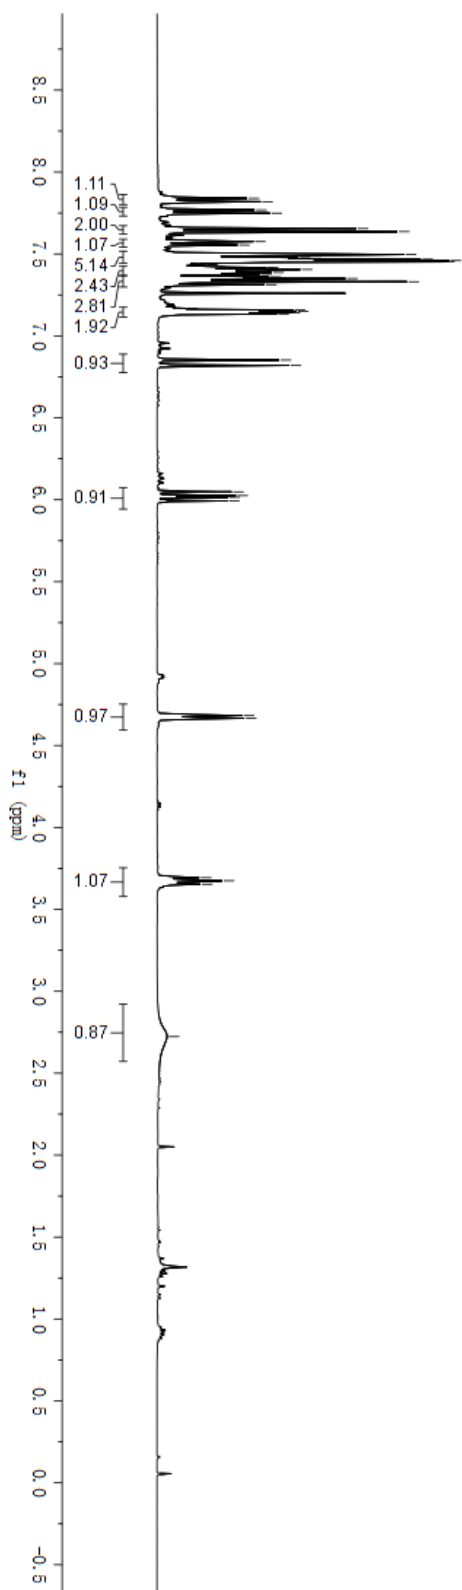

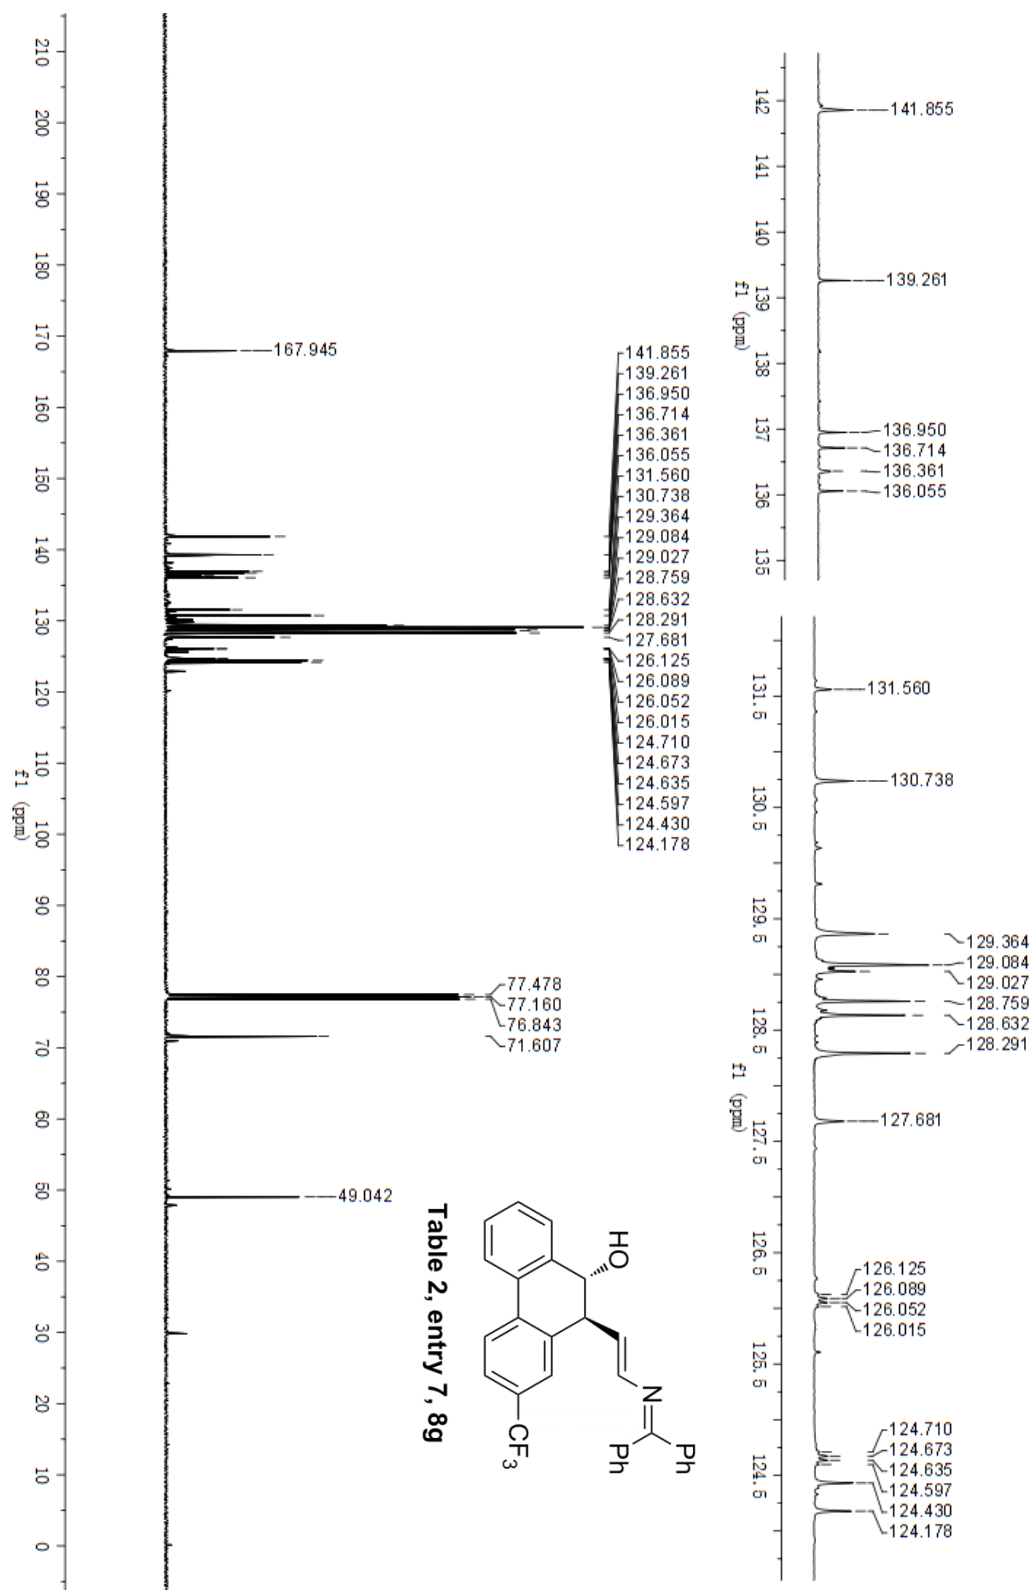

8.089  
8.085  
7.874  
7.859  
7.623  
7.611  
7.609  
7.451  
7.445  
7.440  
7.327  
7.314  
7.260  
7.135  
7.129  
6.839  
6.817

6.002  
5.987  
5.980  
5.965

4.716  
4.705

3.733  
3.721  
3.718  
3.706

8.156  
8.152  
8.141  
8.137  
8.089  
8.085

7.874  
7.859  
7.786  
7.774

7.623  
7.611  
7.609

7.451  
7.445  
7.440  
7.419  
7.409  
7.390  
7.327  
7.314  
7.302  
7.260  
7.141  
7.135  
7.133  
7.129  
7.125

6.839  
6.817

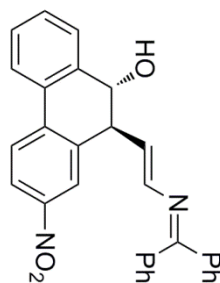

Table 2, entry 8, 8h

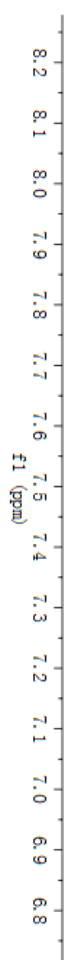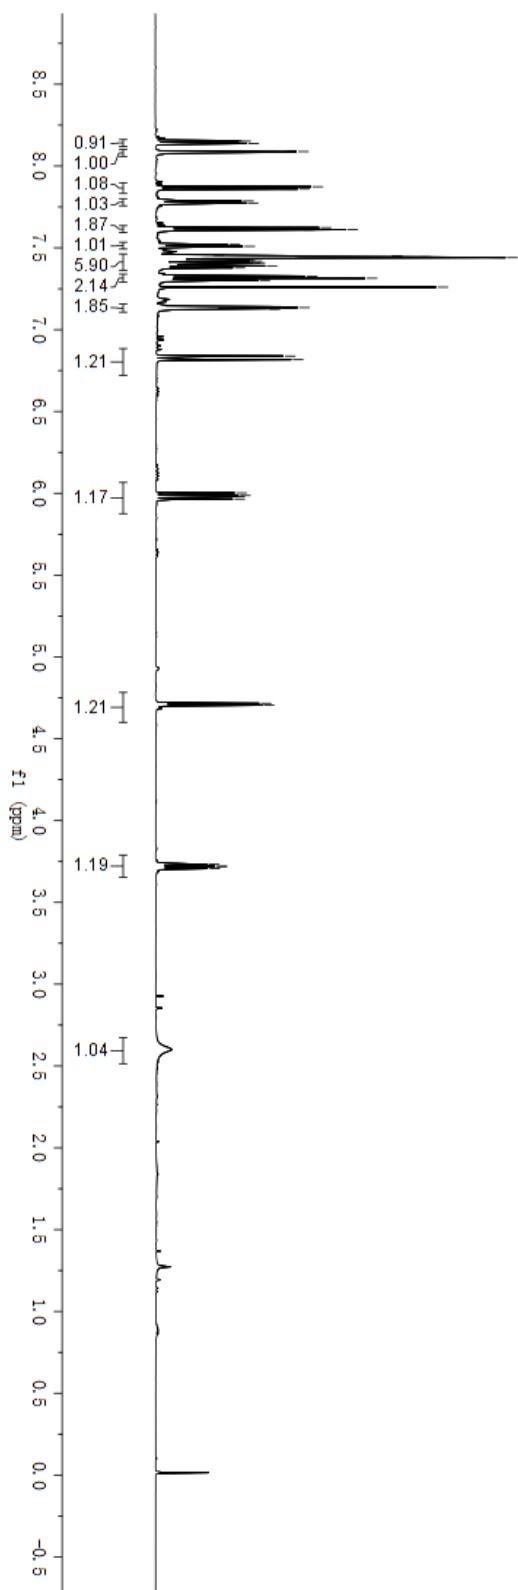



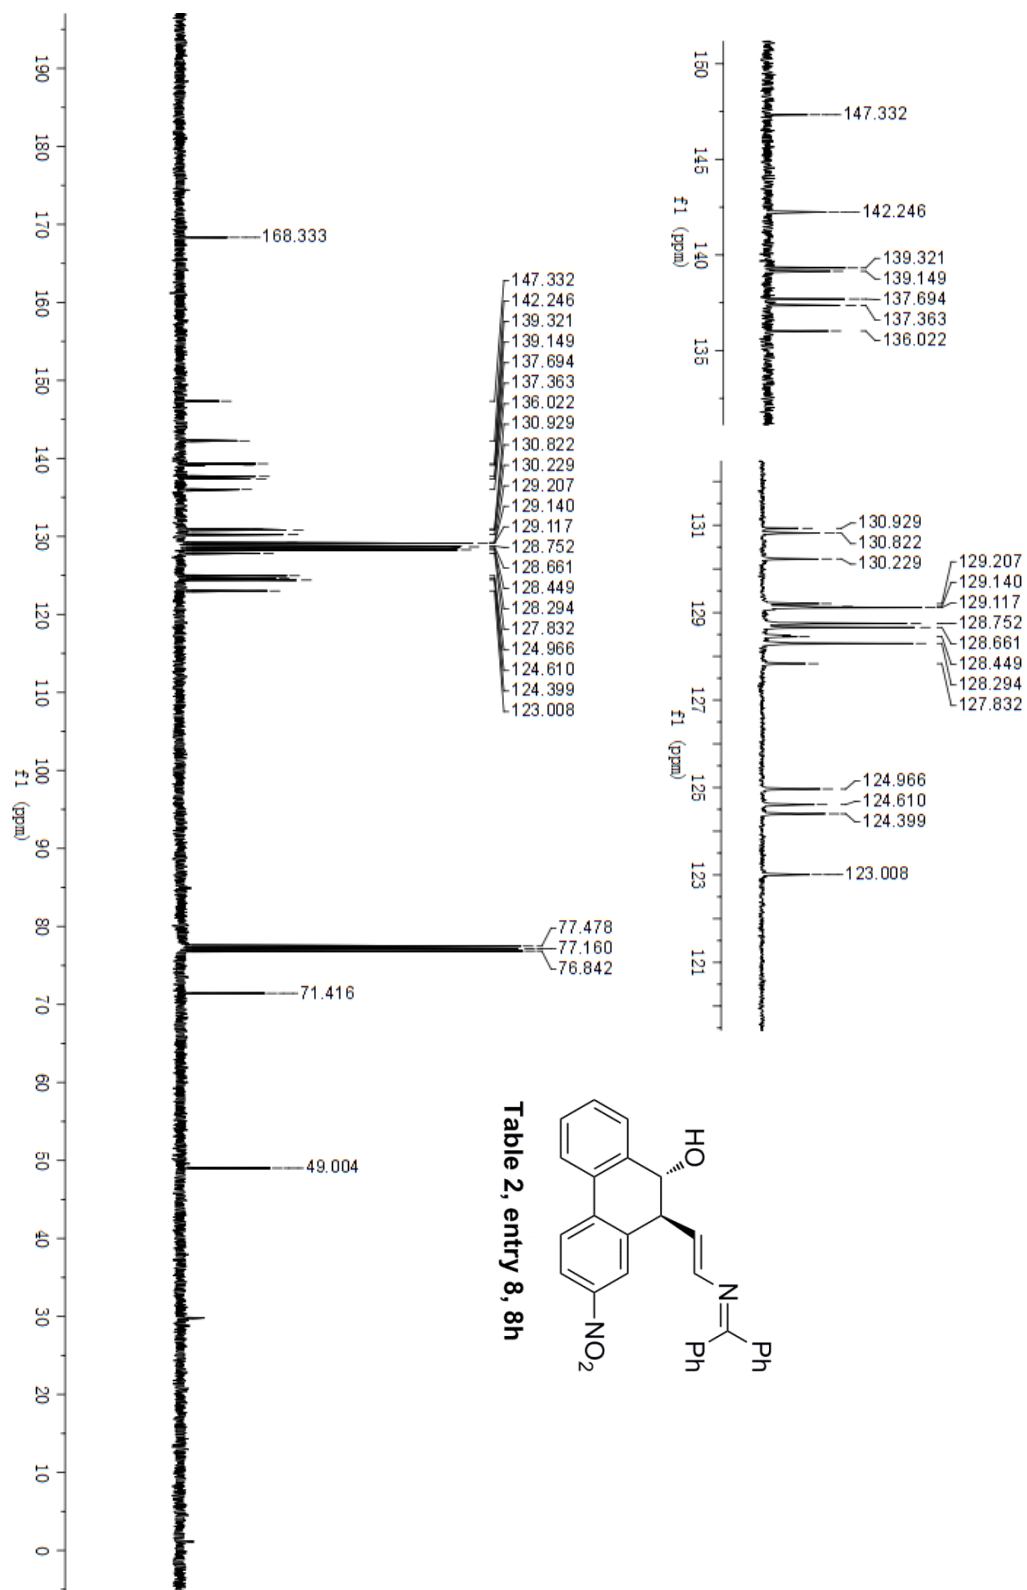

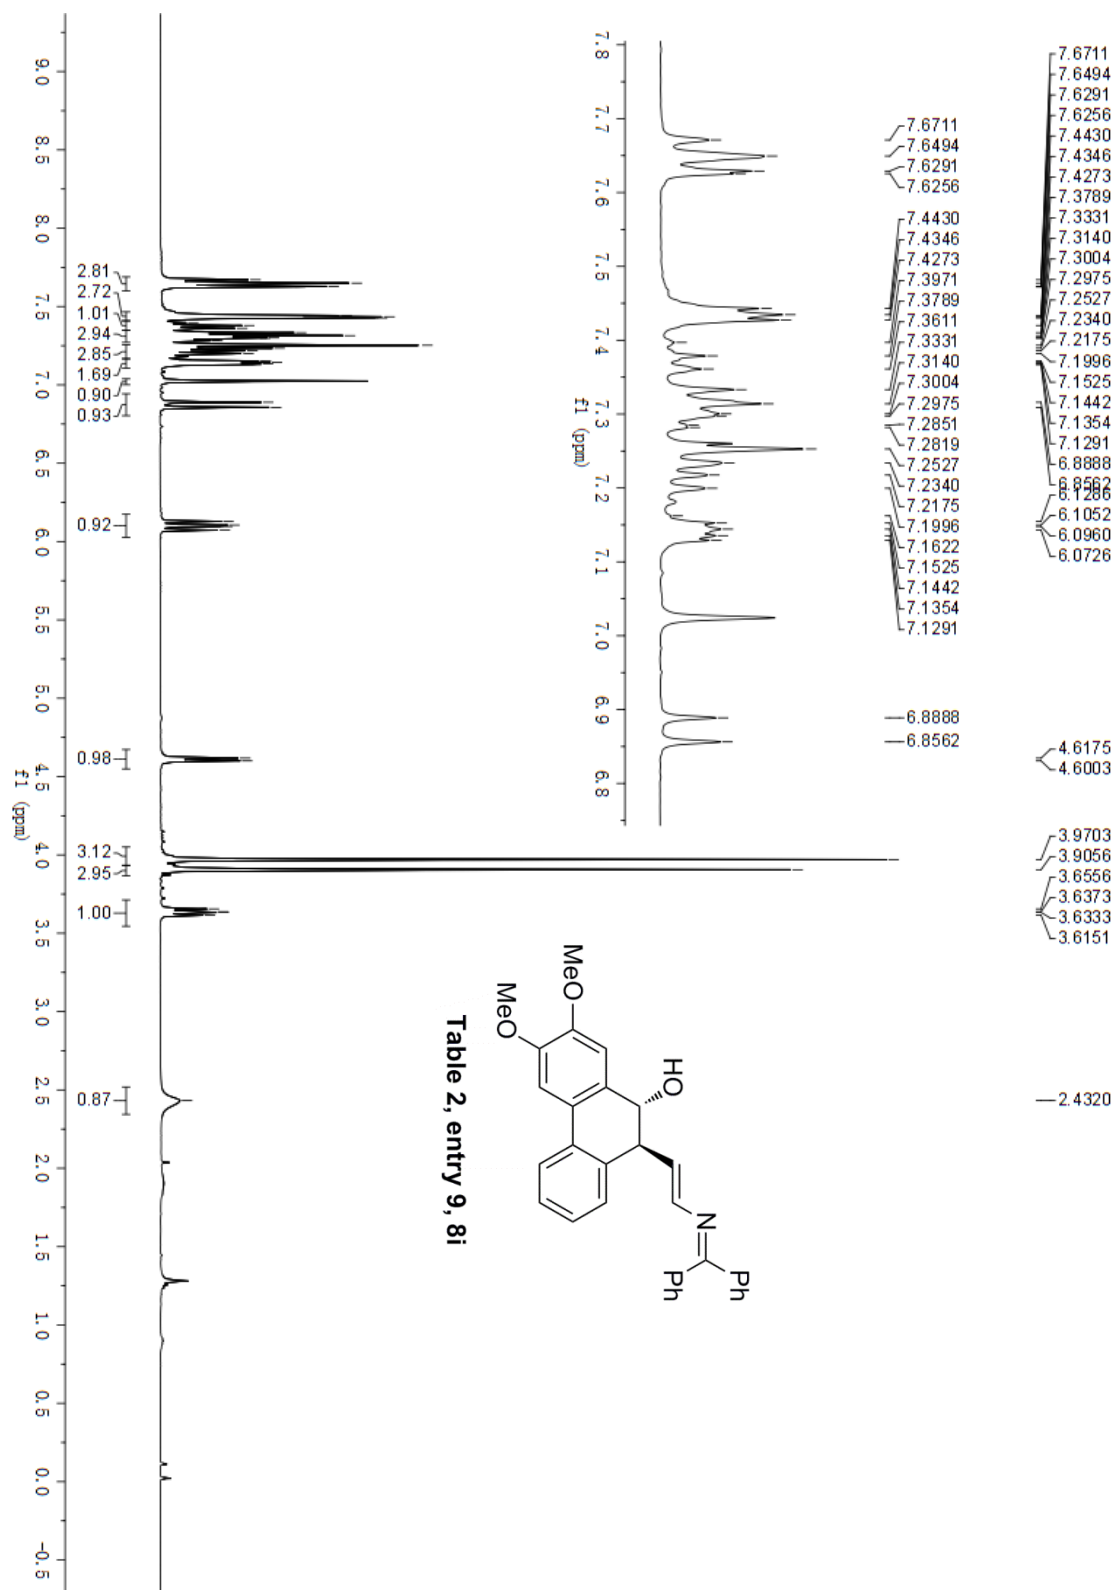

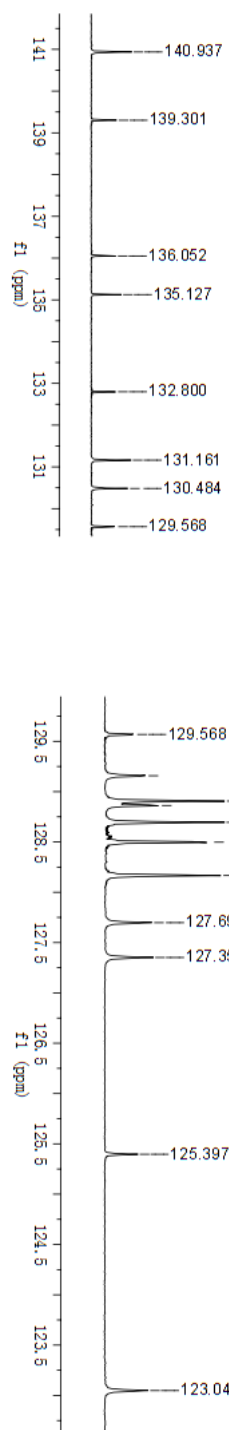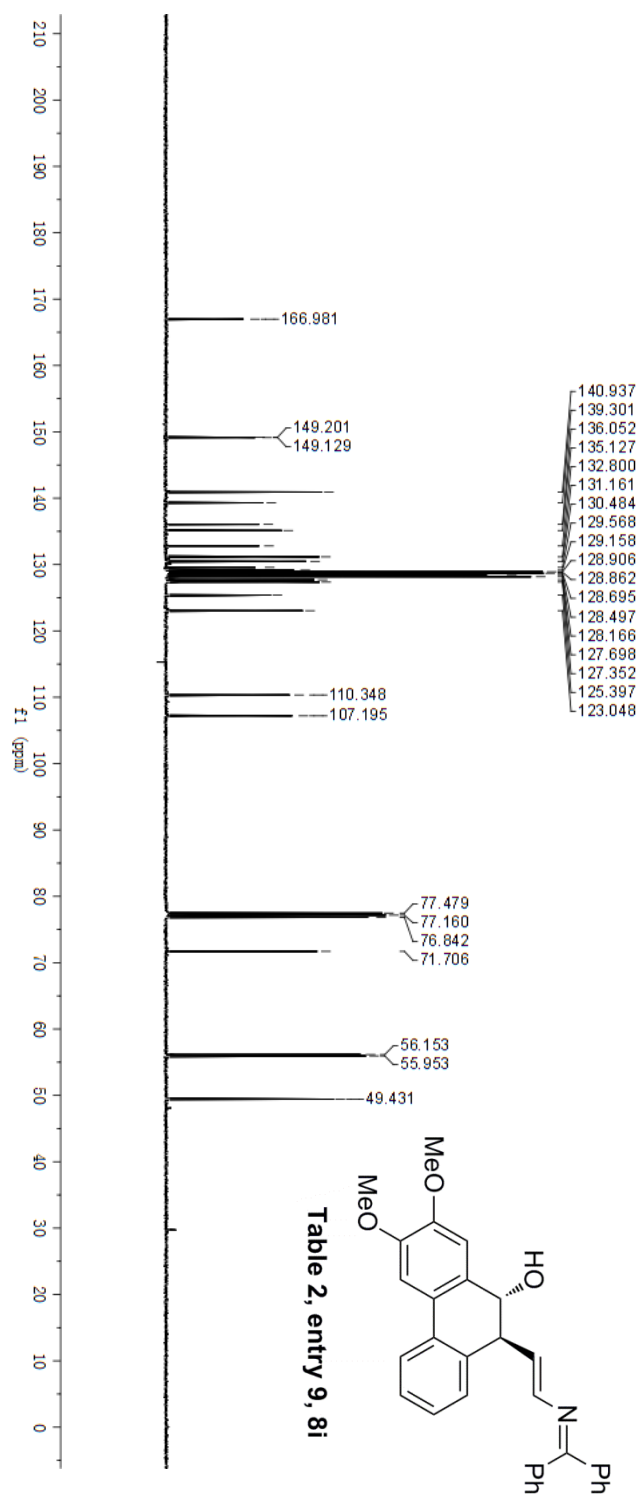

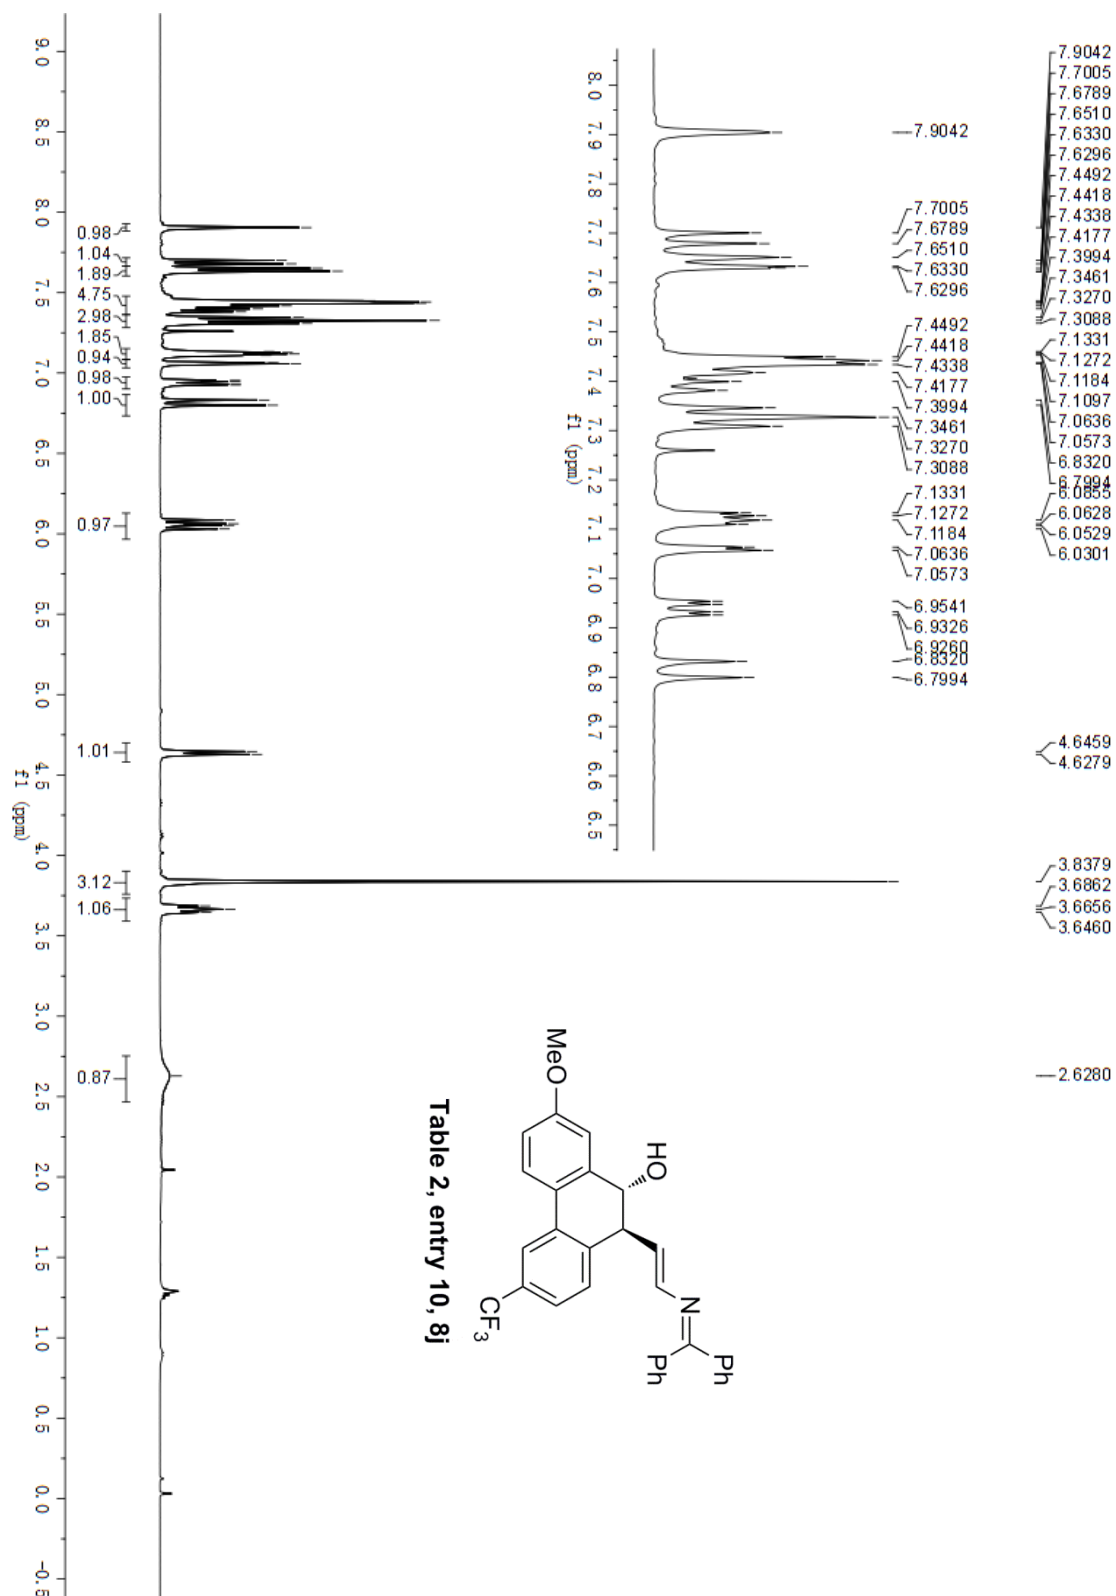

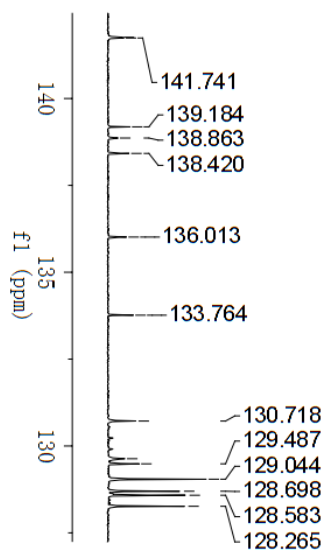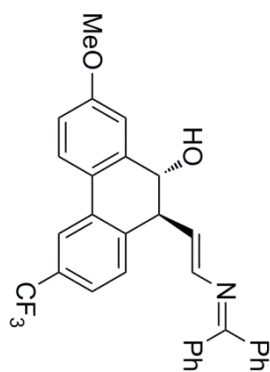

Table 2, entry 10, 8j

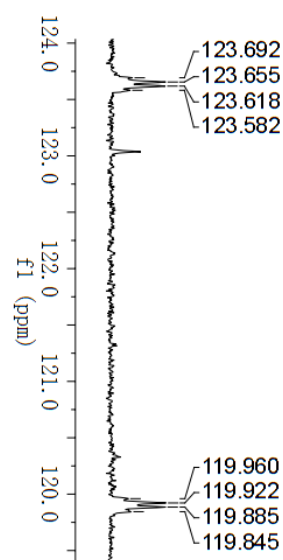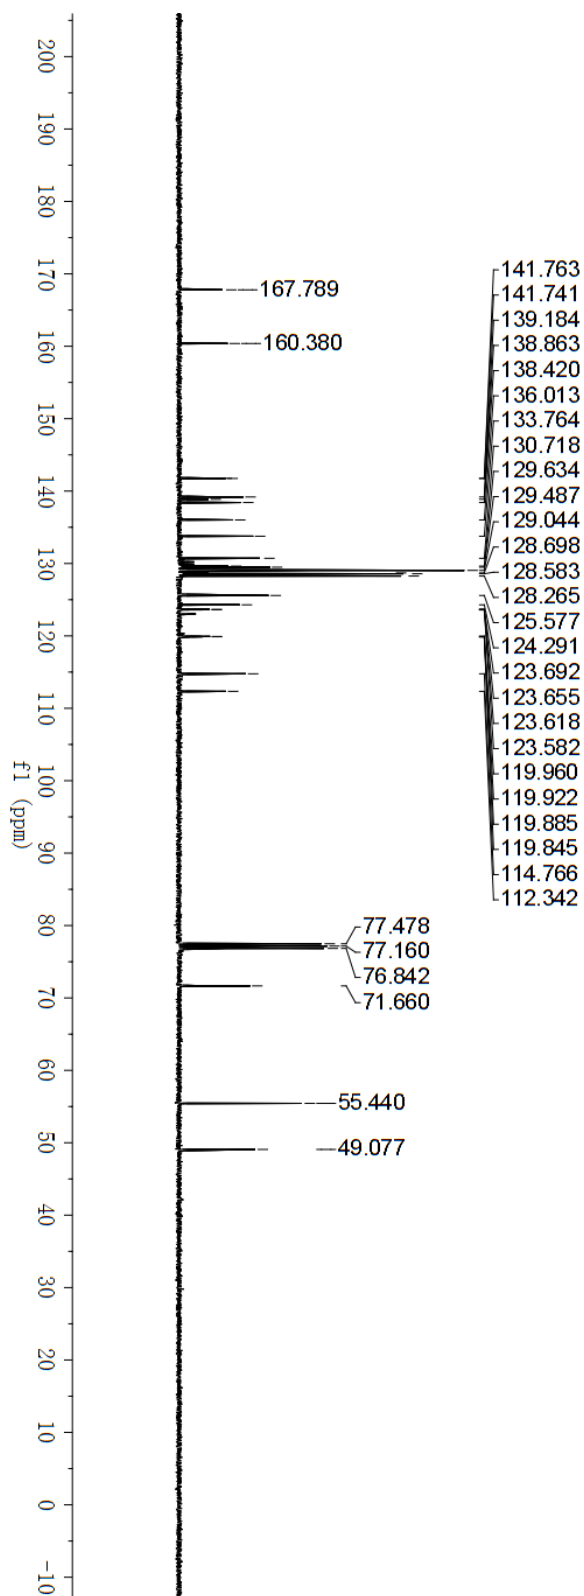

7.999  
7.986  
7.927  
7.907  
7.791  
7.772  
7.676  
7.655  
7.576  
7.476  
7.468  
7.447  
7.429  
7.421  
7.402  
7.272  
7.157  
7.125  
6.435  
6.408  
6.402  
6.376

4.734  
4.704

3.583  
3.555  
3.528

2.504

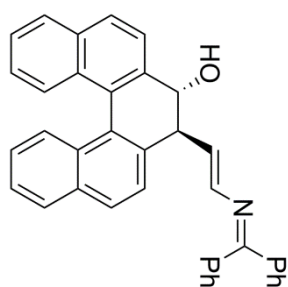

Table 2, entry 11, 8k

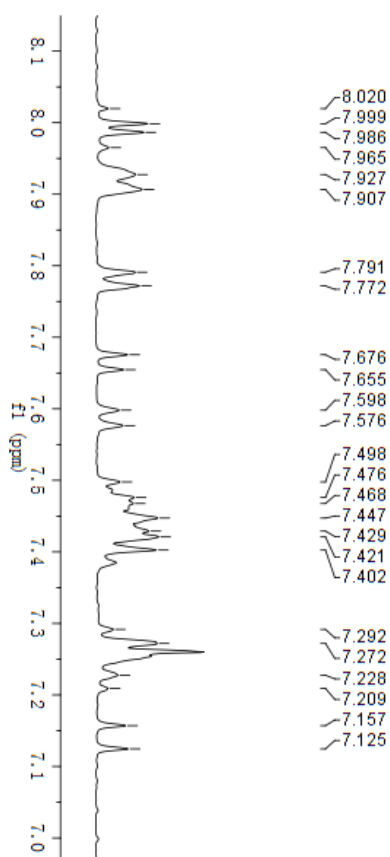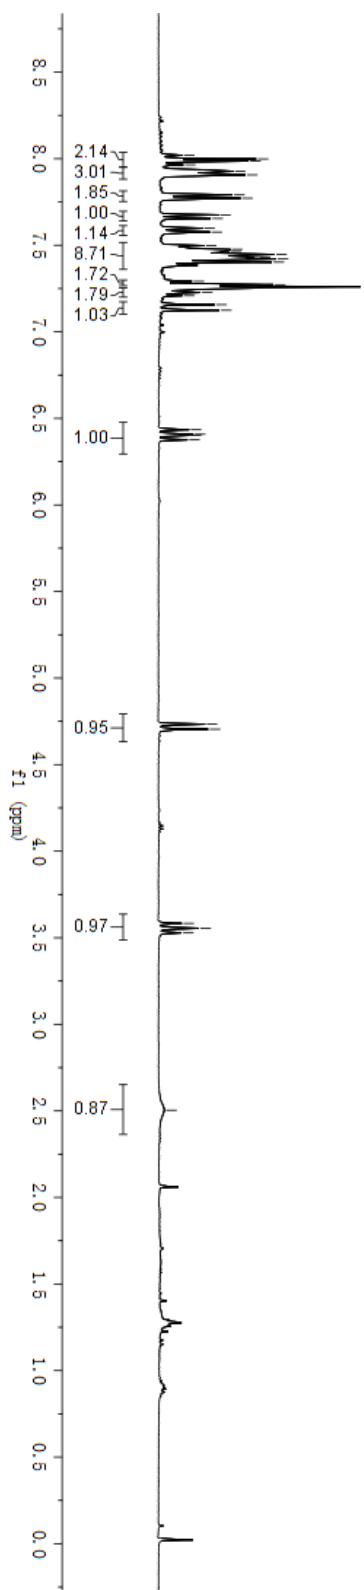

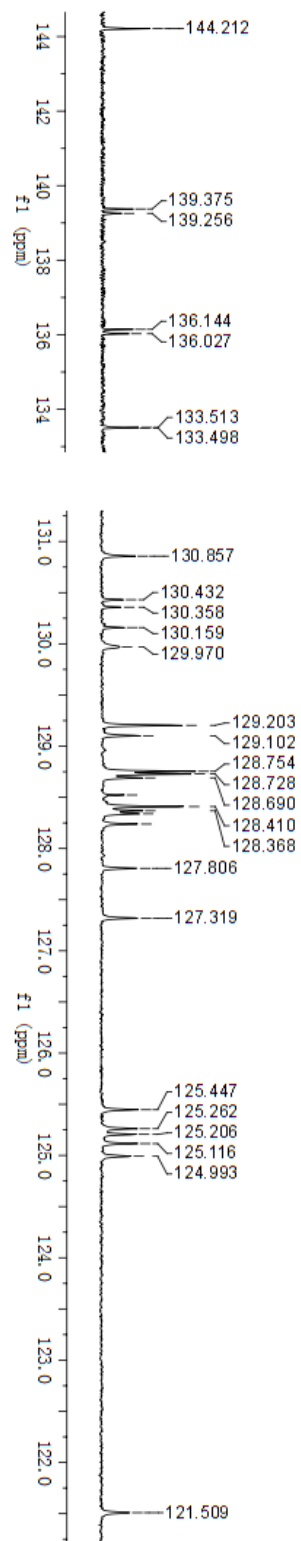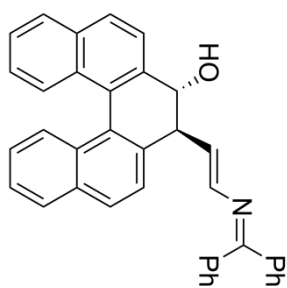

Table 2, entry 11, 8k

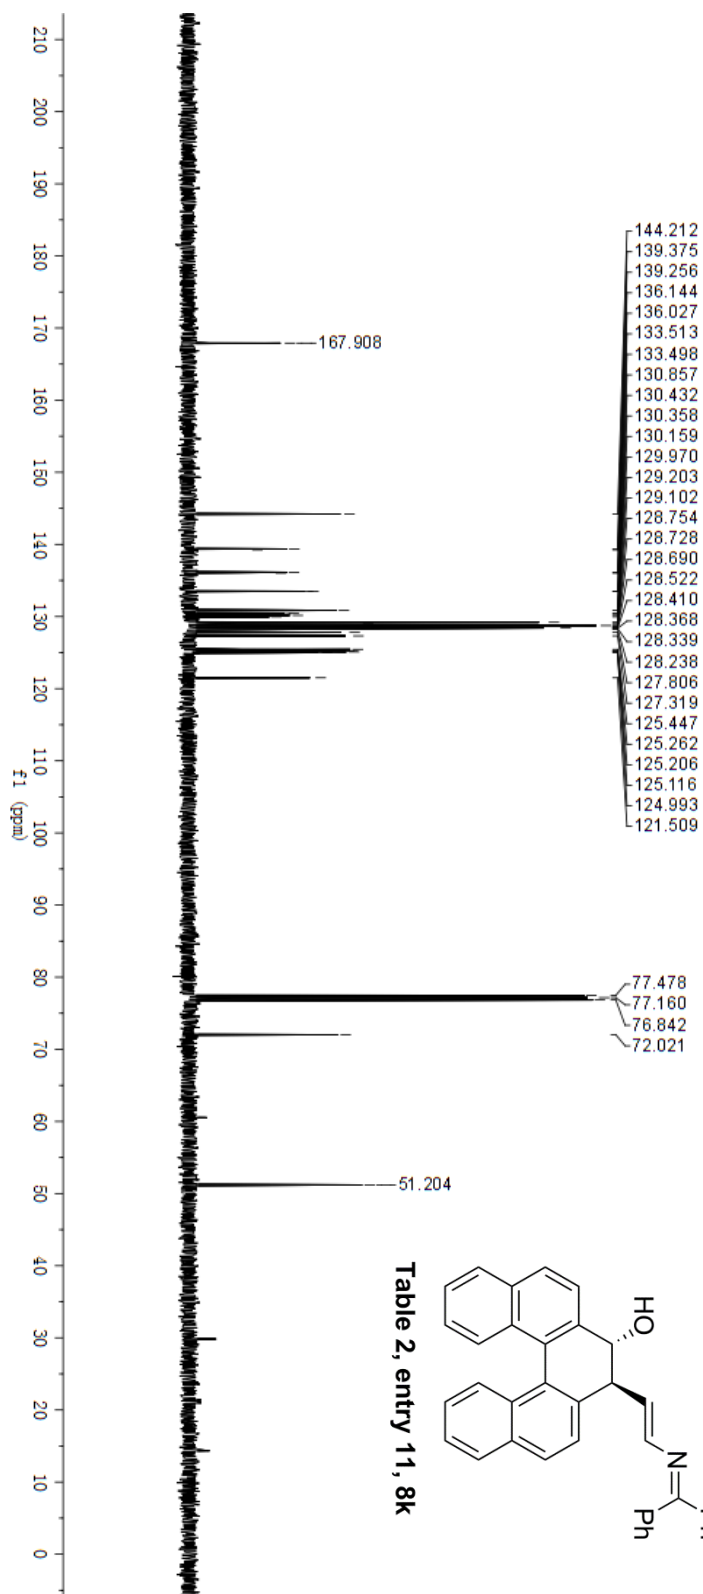

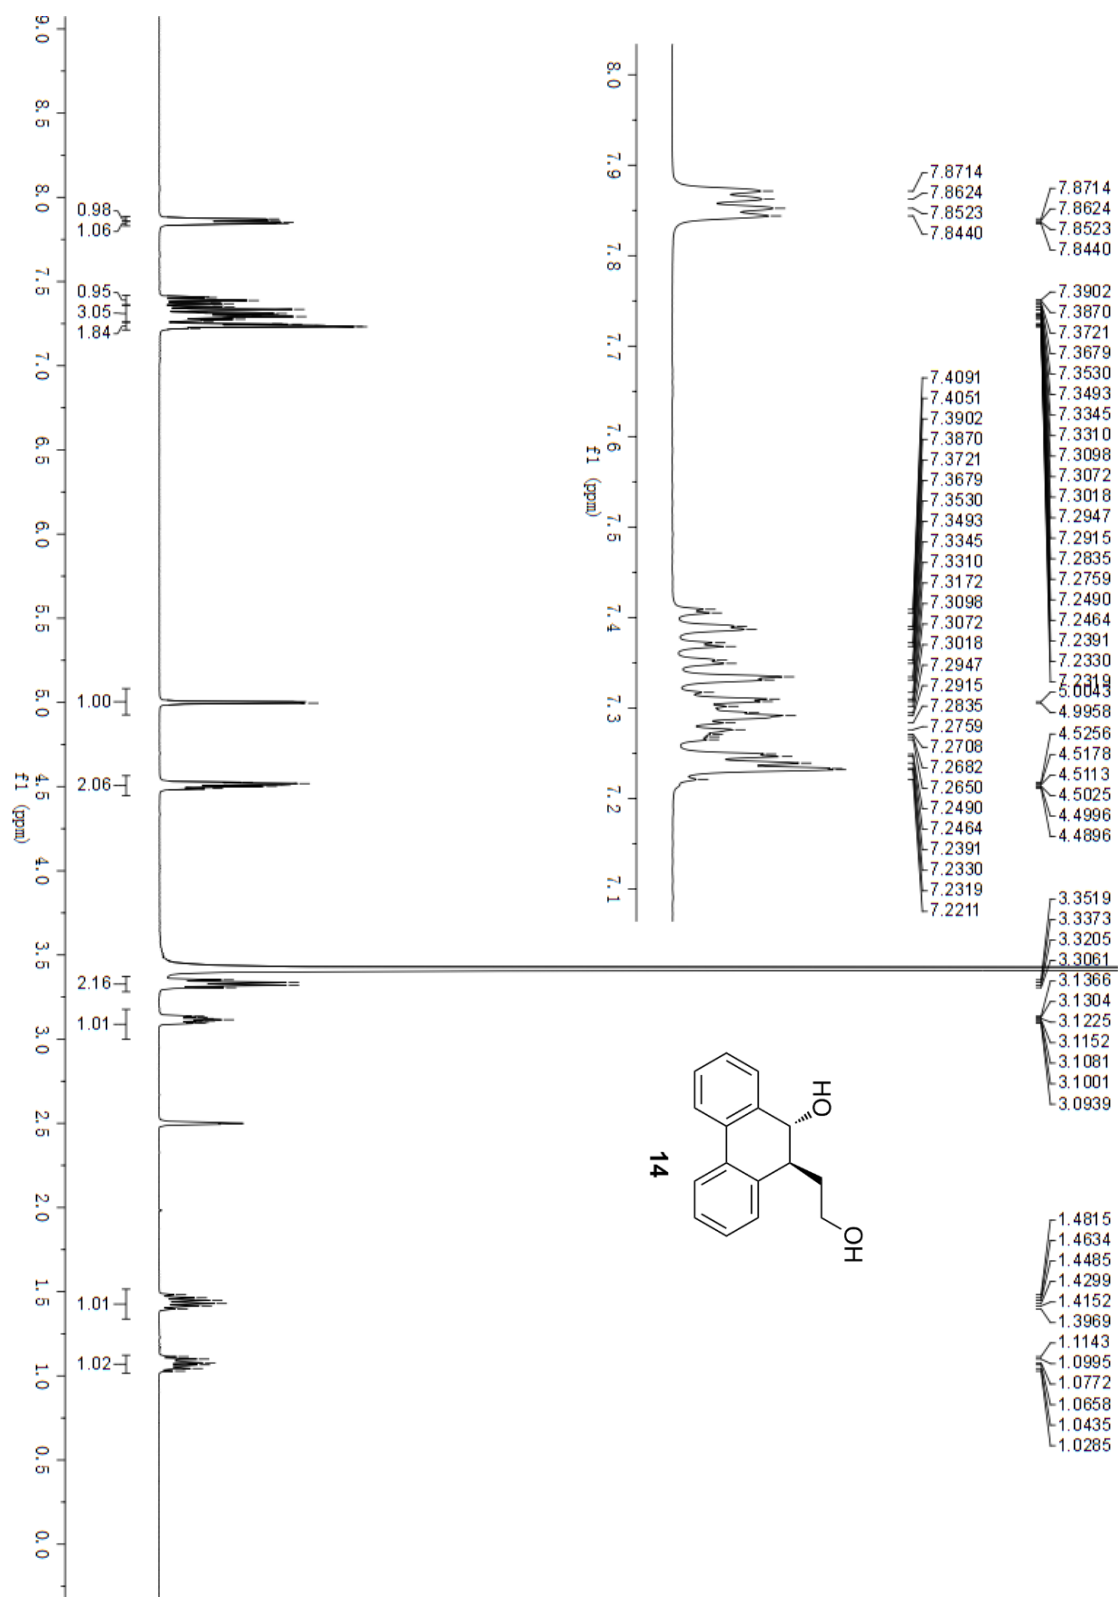



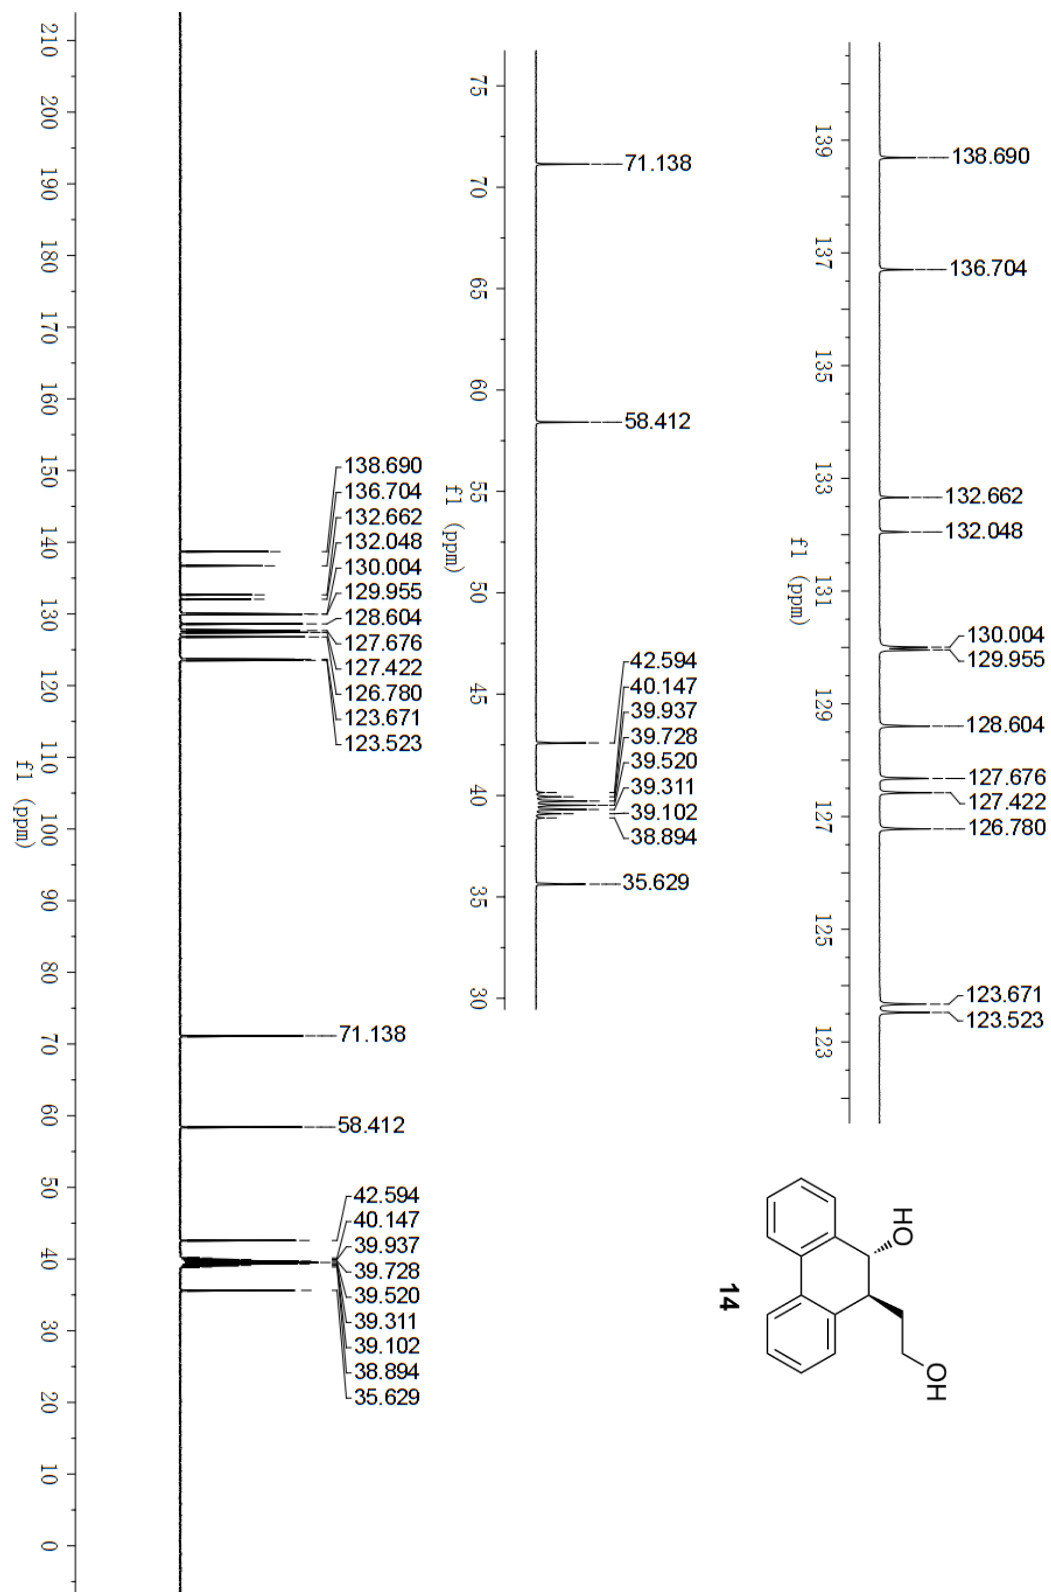

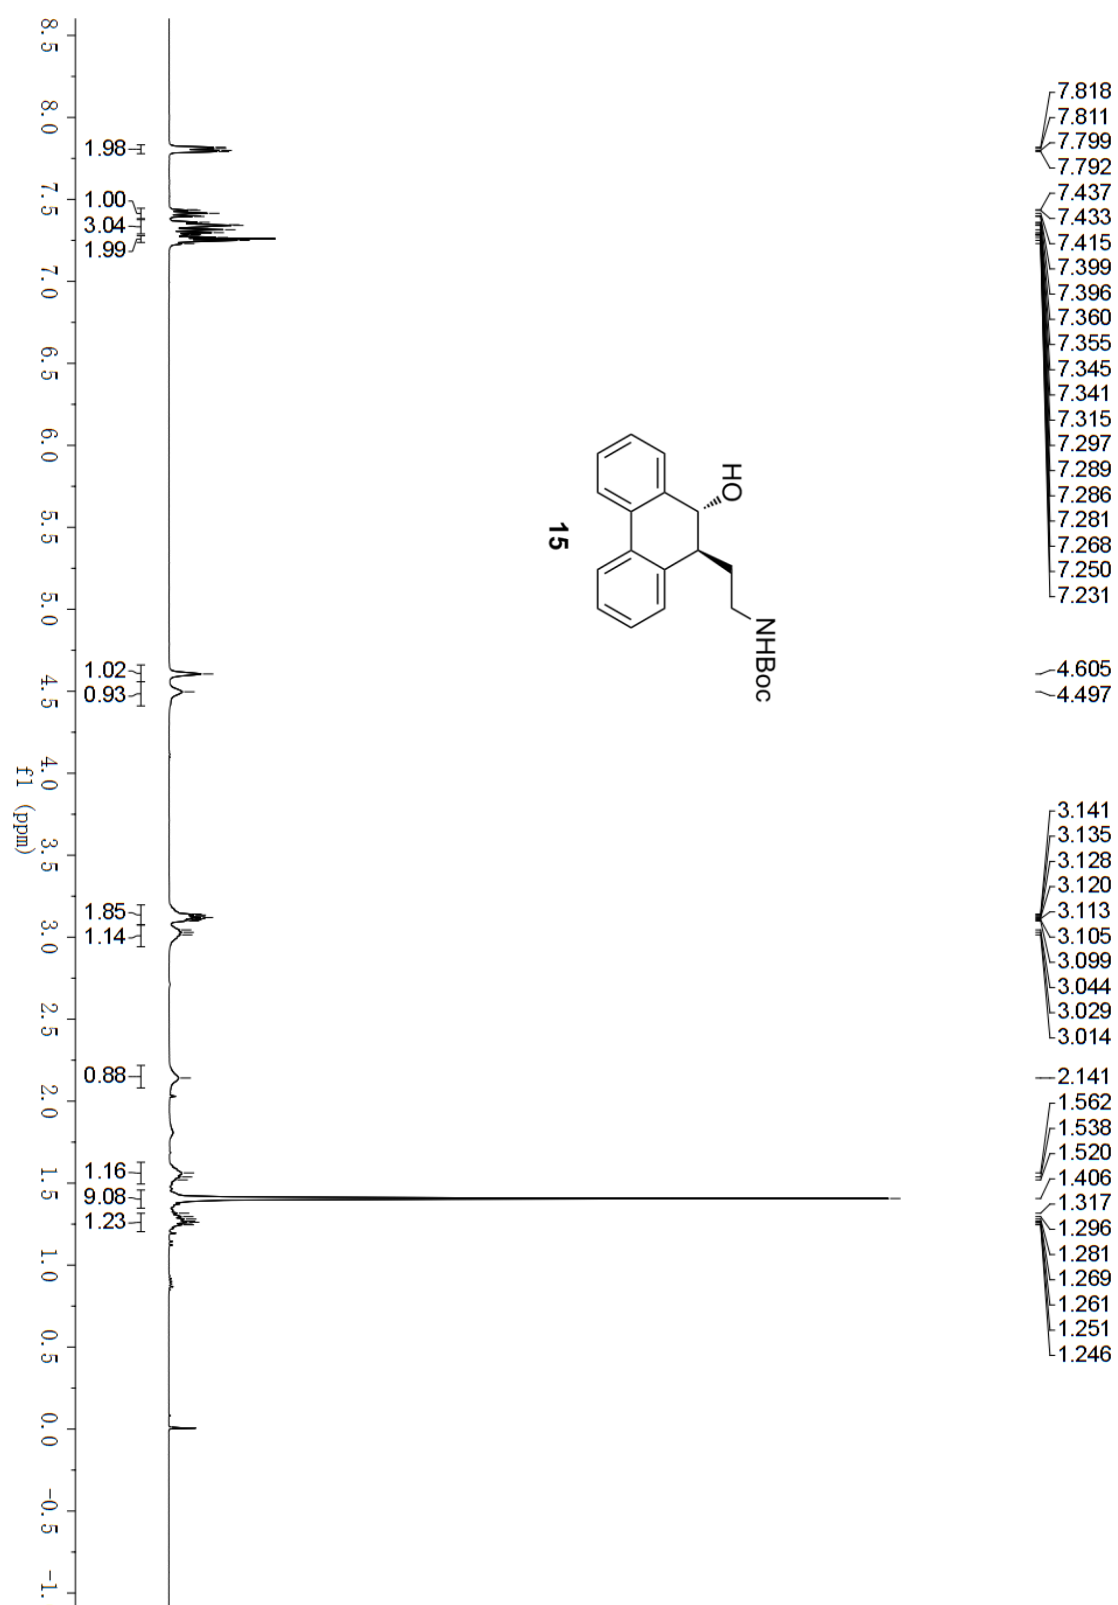

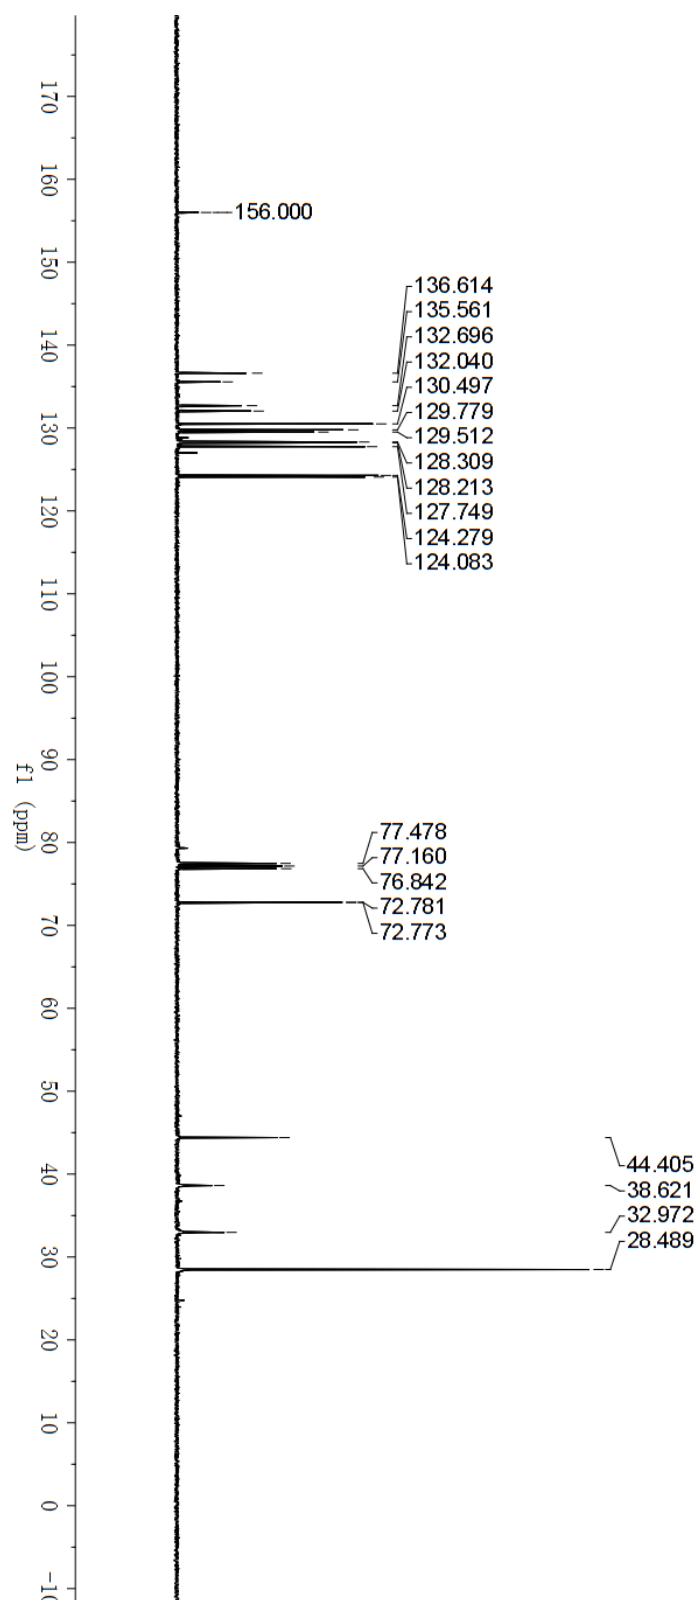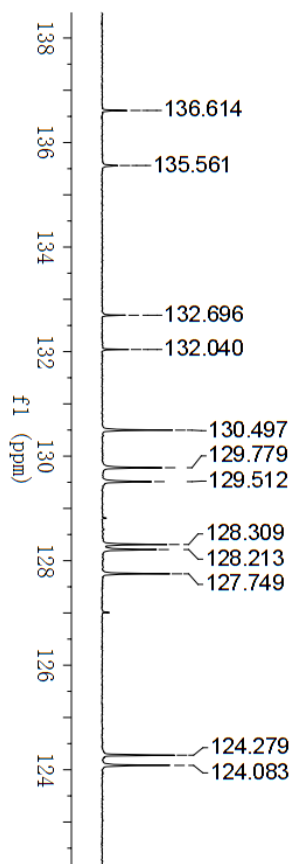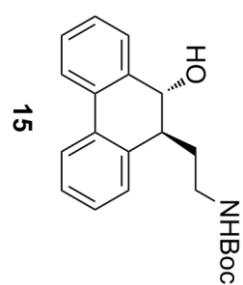

Supplement: c6qo00846a1.pdf [file c6qo00846a1.pdf]
